# Supplementary material
Source: publisher site journal article supplement (https://www.dovepress.com/article/459150)
Supplement: Supplementary file 1 [file get_supplementary_file.php]

**Supplementary Material**

**
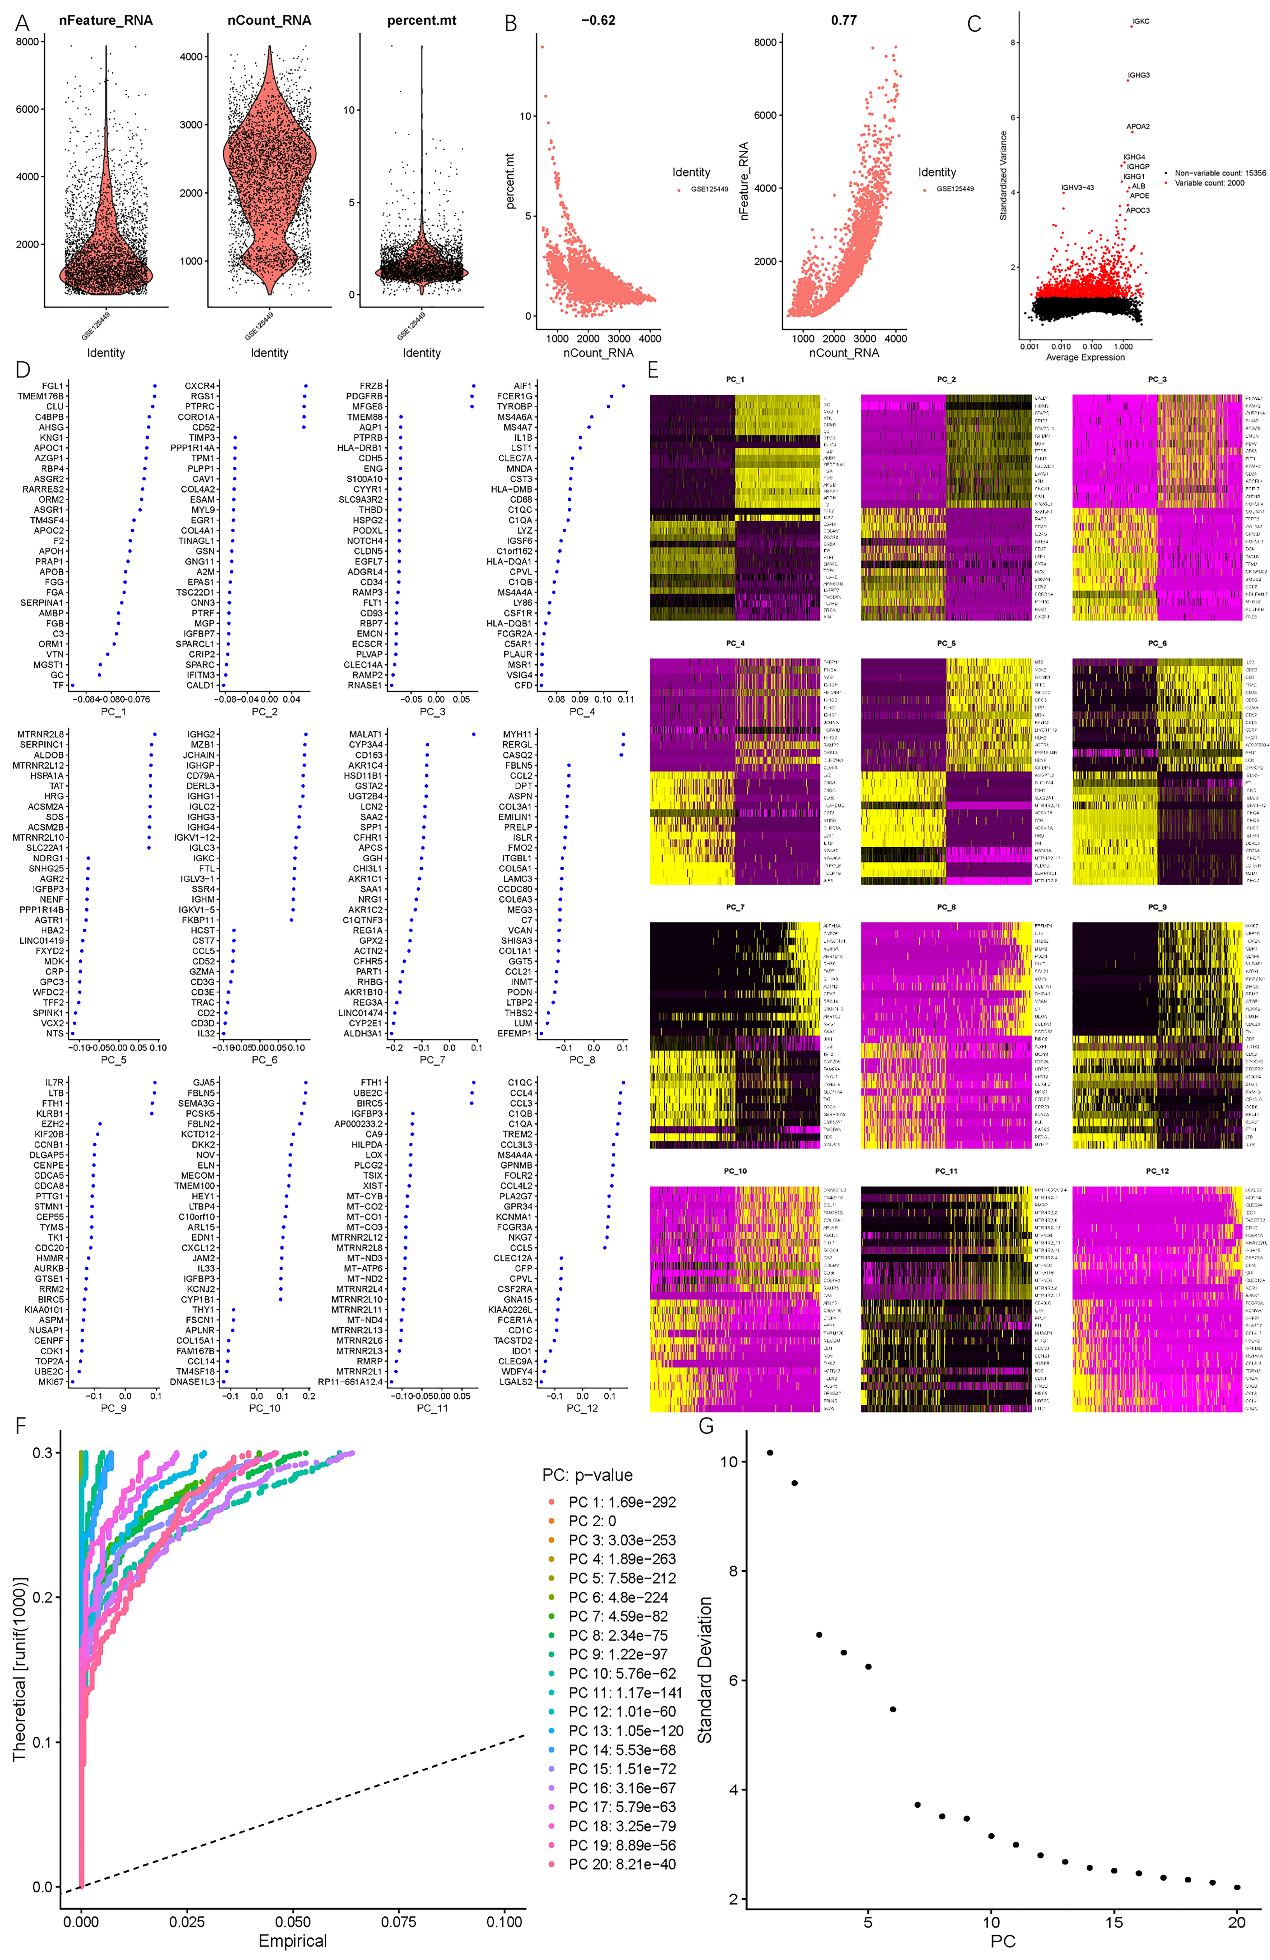
Supplementary Figure 1**

**Analysis process of GSE125449 cohort.** (A) Violin plot showed number of number of genes detected (nFeature_RNA), number of molecules detected (nCount_RNA) and percent of mitochondrial (percent.mt) derived transcripts per single cell after quality control in GSE125449 cohort. (B) Associations of nFeature_RNA, nCount_RNA and percent.mt in GSE125449 cohort. (C) The top 2000 variable features of GSE125449 cohort. (D) The top 10 genes associated with reduction components. (E) Dimensional reduction heatmap showed the top 30 genes in each principal components. (F) JackStrawPlot identified significant principal components. (G) ElbowPlot determined dimensions based on inflection points.

**
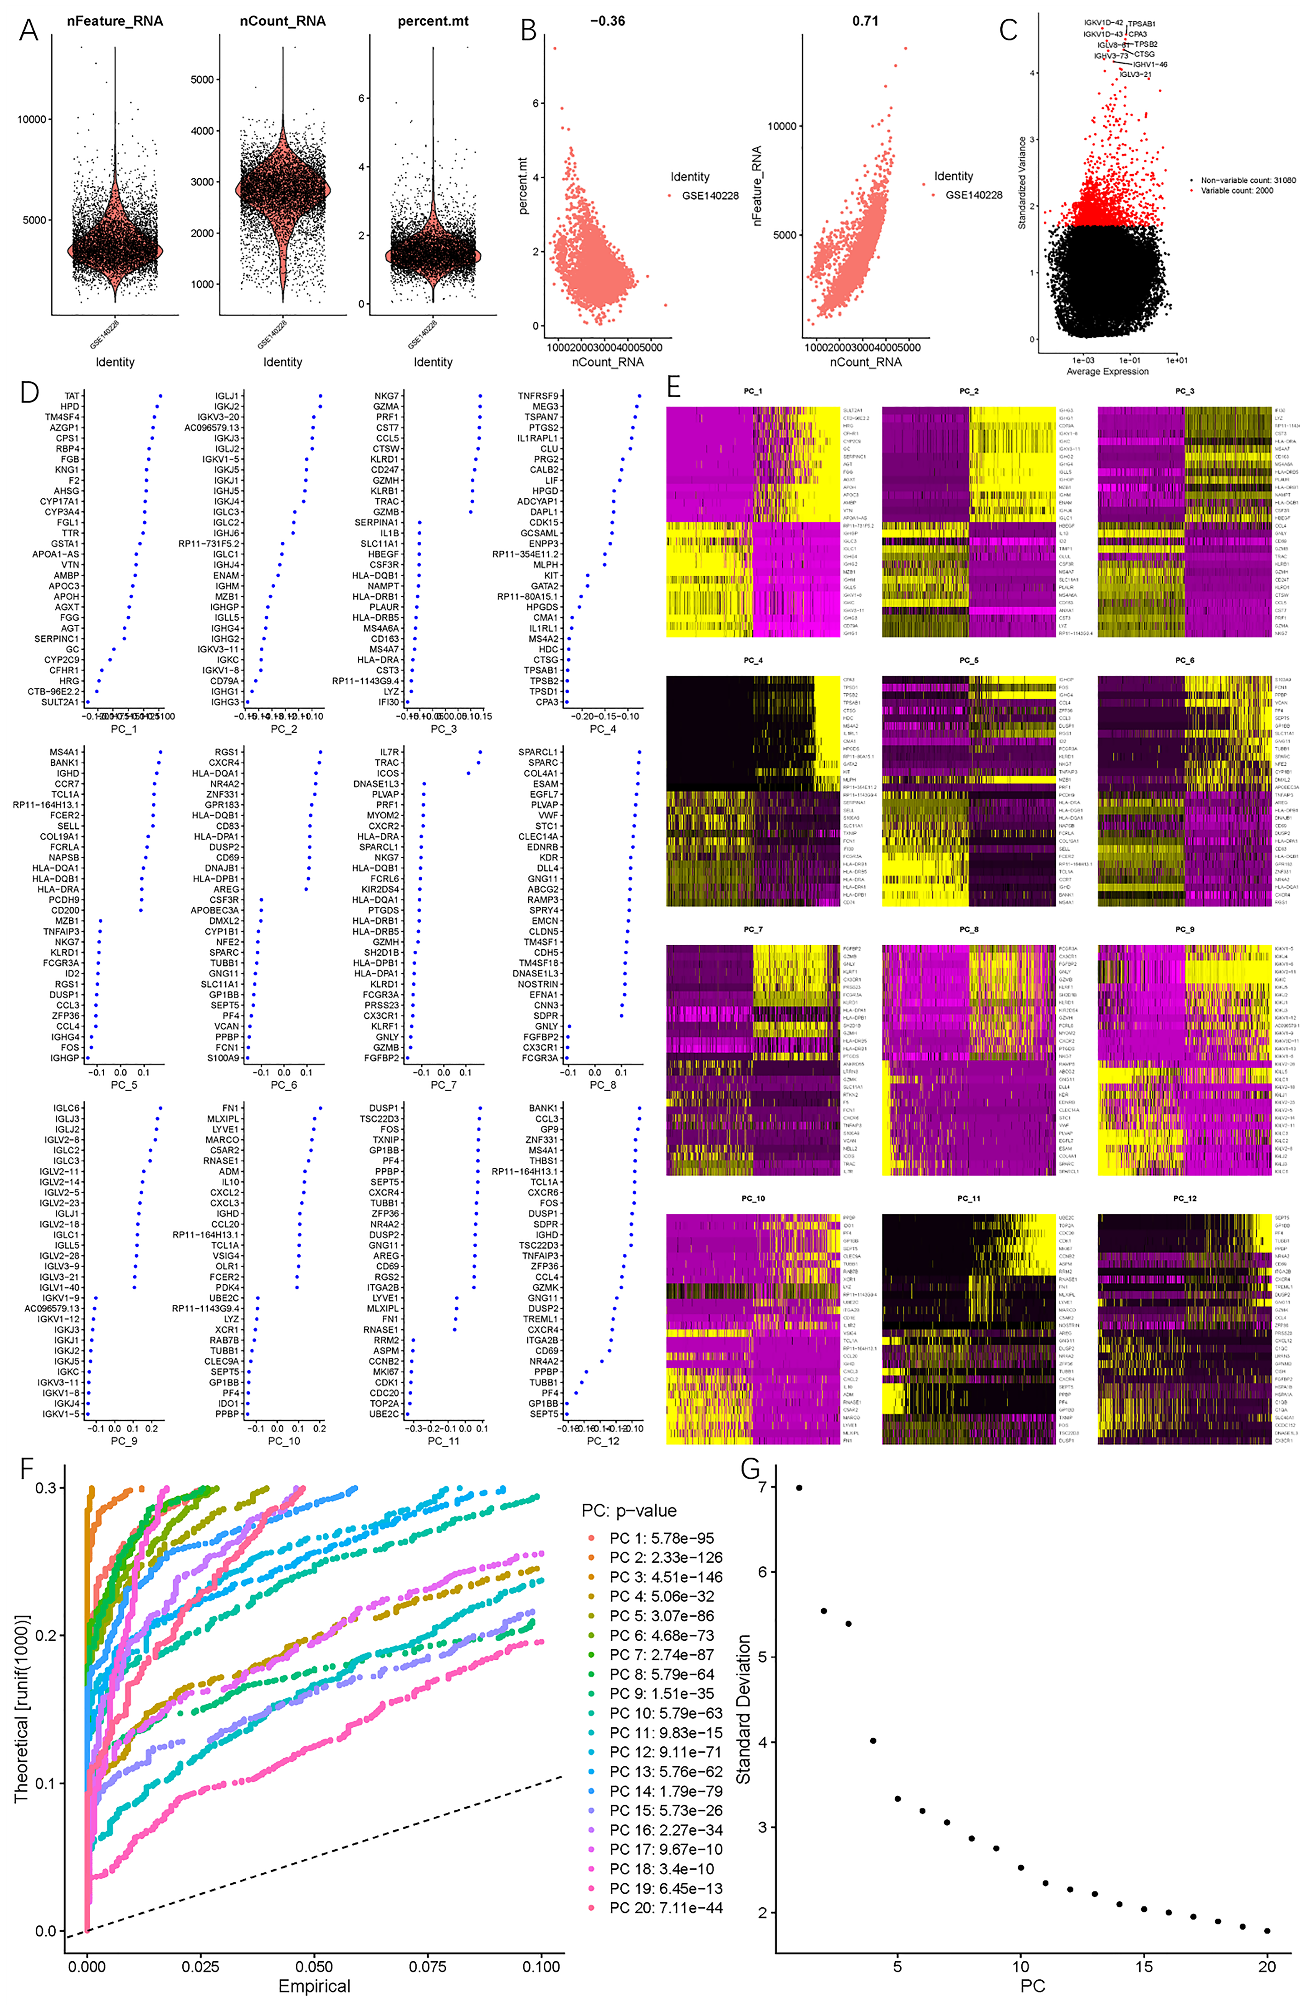
Supplementary Figure 2**

**Analysis process of GSE140228 cohort.** (A) Violin plot showed number of number of genes detected (nFeature_RNA), number of molecules detected (nCount_RNA) and percent of mitochondrial (percent.mt) derived transcripts per single cell after quality control in GSE140228 cohort. (B) Associations of nFeature_RNA, nCount_RNA and percent.mt in GSE140228 cohort. (C) The top 2000 variable features of GSE140228 cohort. (D) The top 10 genes associated with reduction components. (E) Dimensional reduction heatmap showed the top 30 genes in each principal components. (F) JackStrawPlot identified significant principal components. (G) ElbowPlot determined dimensions based on inflection points.

**
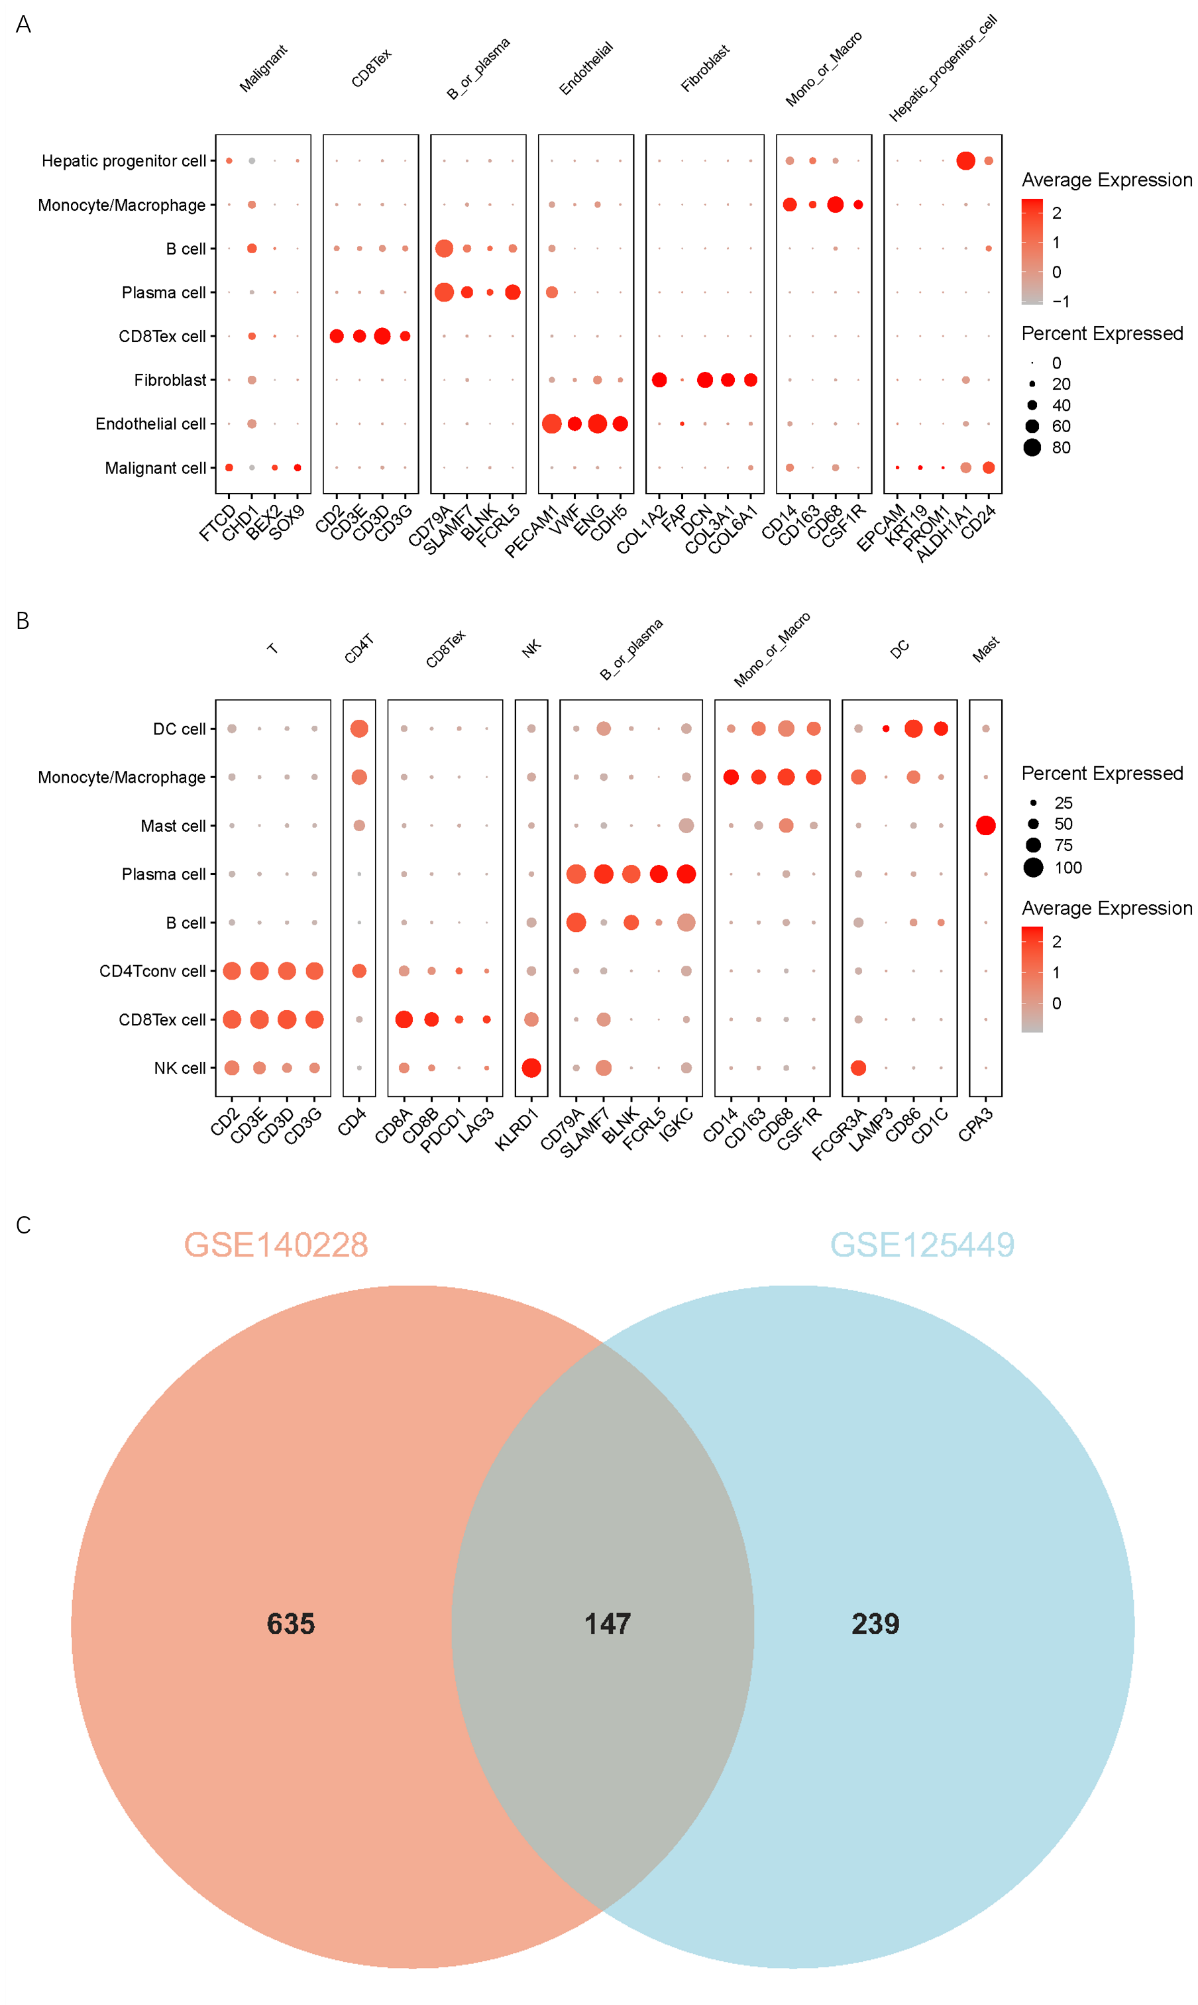
Supplementary Figure 3**

**Marker genes of different cell types.** (A-B) Marker genes expression in different cell types of GSE125449 and GSE140228 cohorts. (A) GSE125449 cohort. (B) GSE140228 cohort. (C) Venn plot showing the intersection of CD8 Tex marker genes.

**
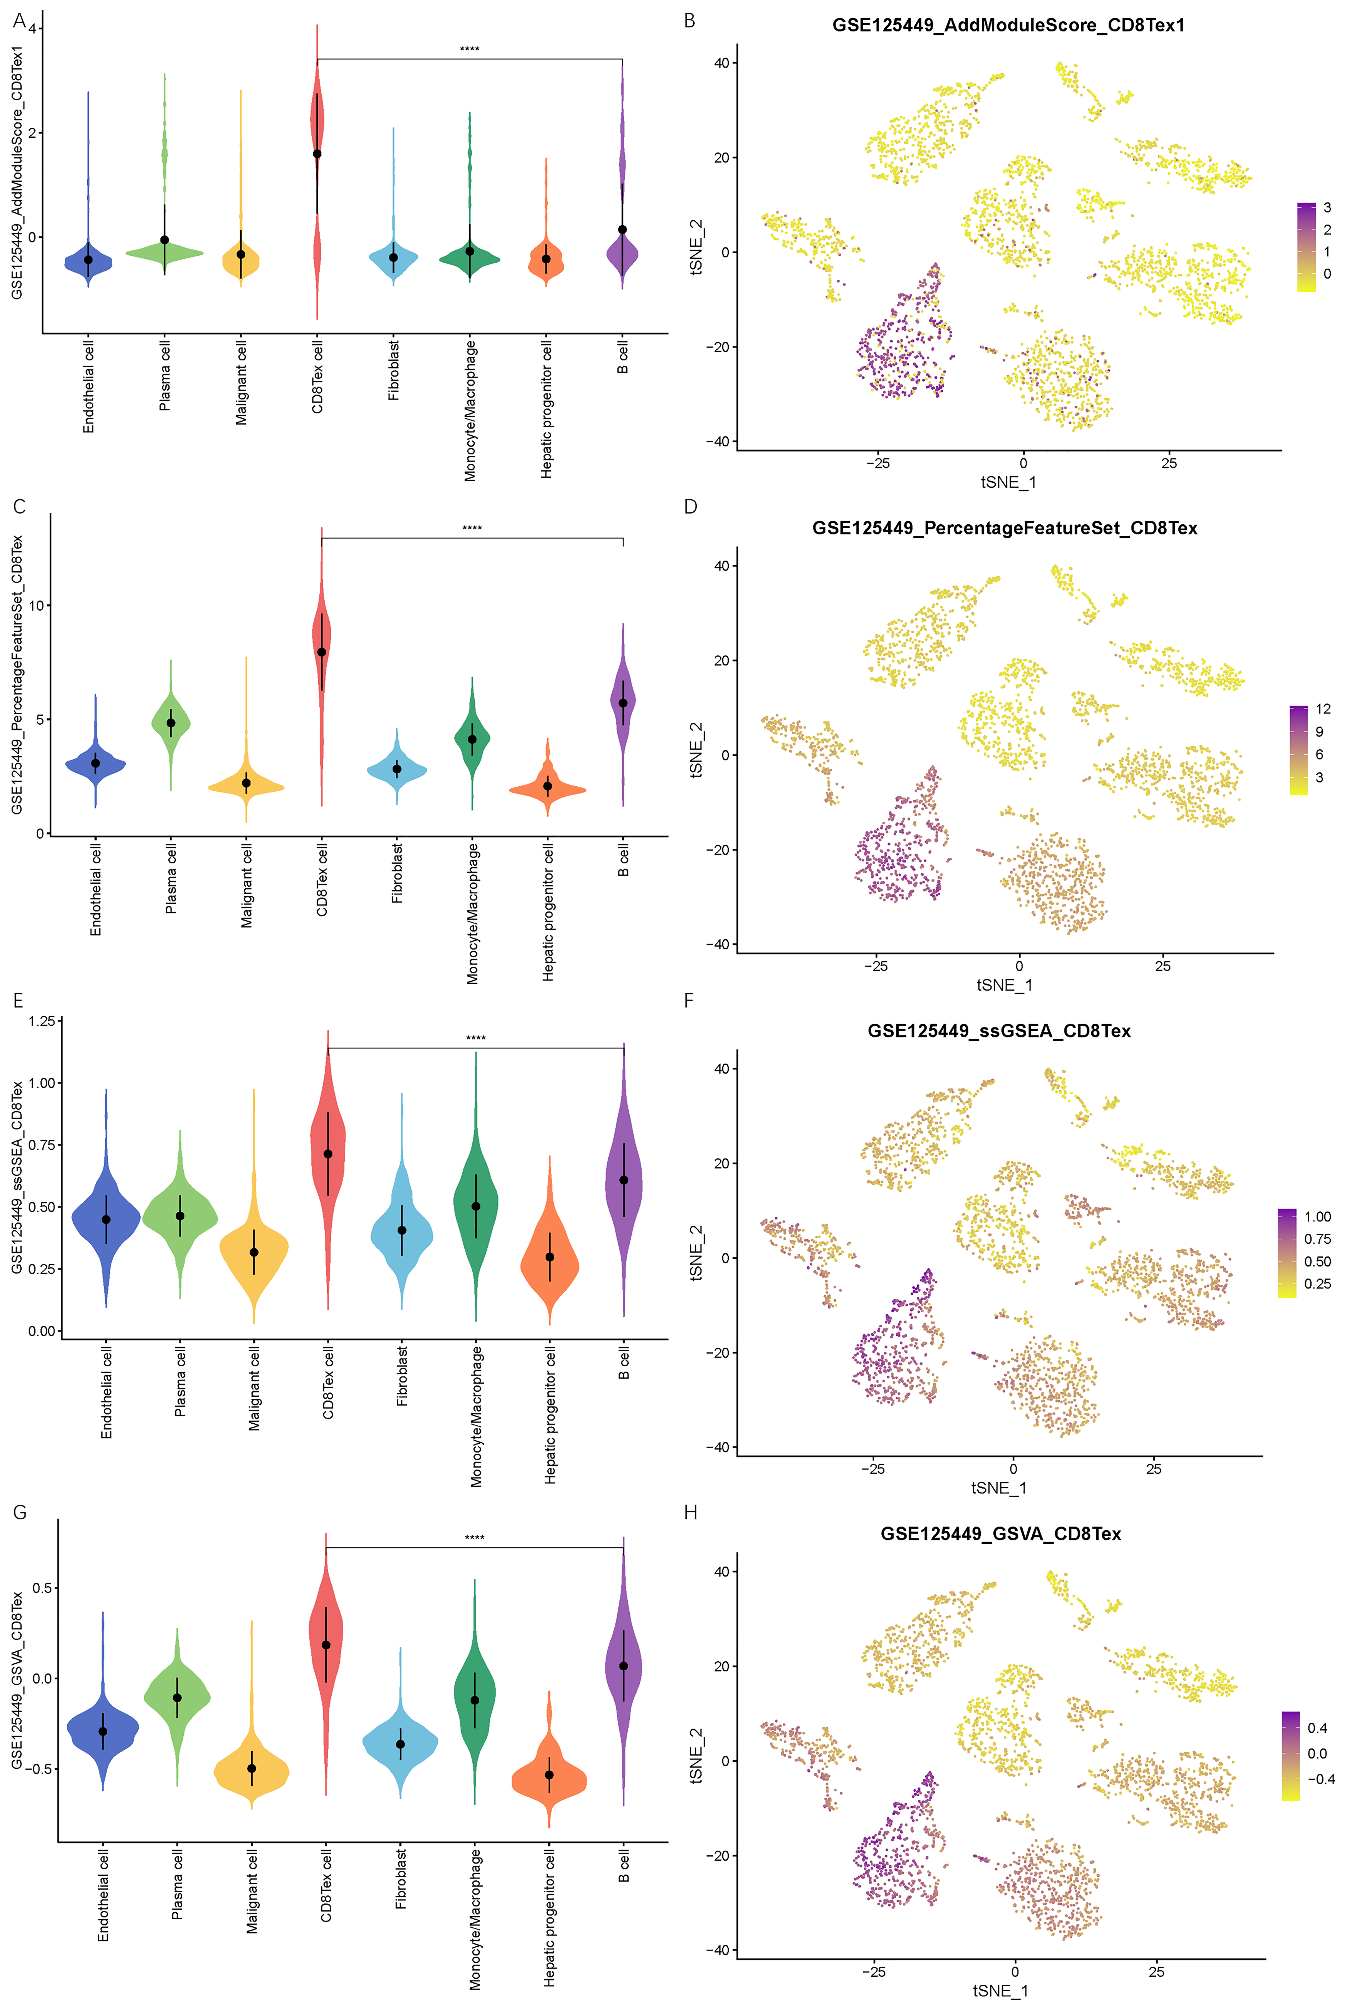
Supplementary Figure 4**

**CD8 Tex-related scores and feature plots of cell clusters in GSE125449 cohort.** (A-B) AddModuleScore algorithm. (C-D) PercentageFeatureSet algorithm. (E-F) ssGSEA algorithm. (G-H) GSVA algorithm. **** *P* < 0.0001.

**
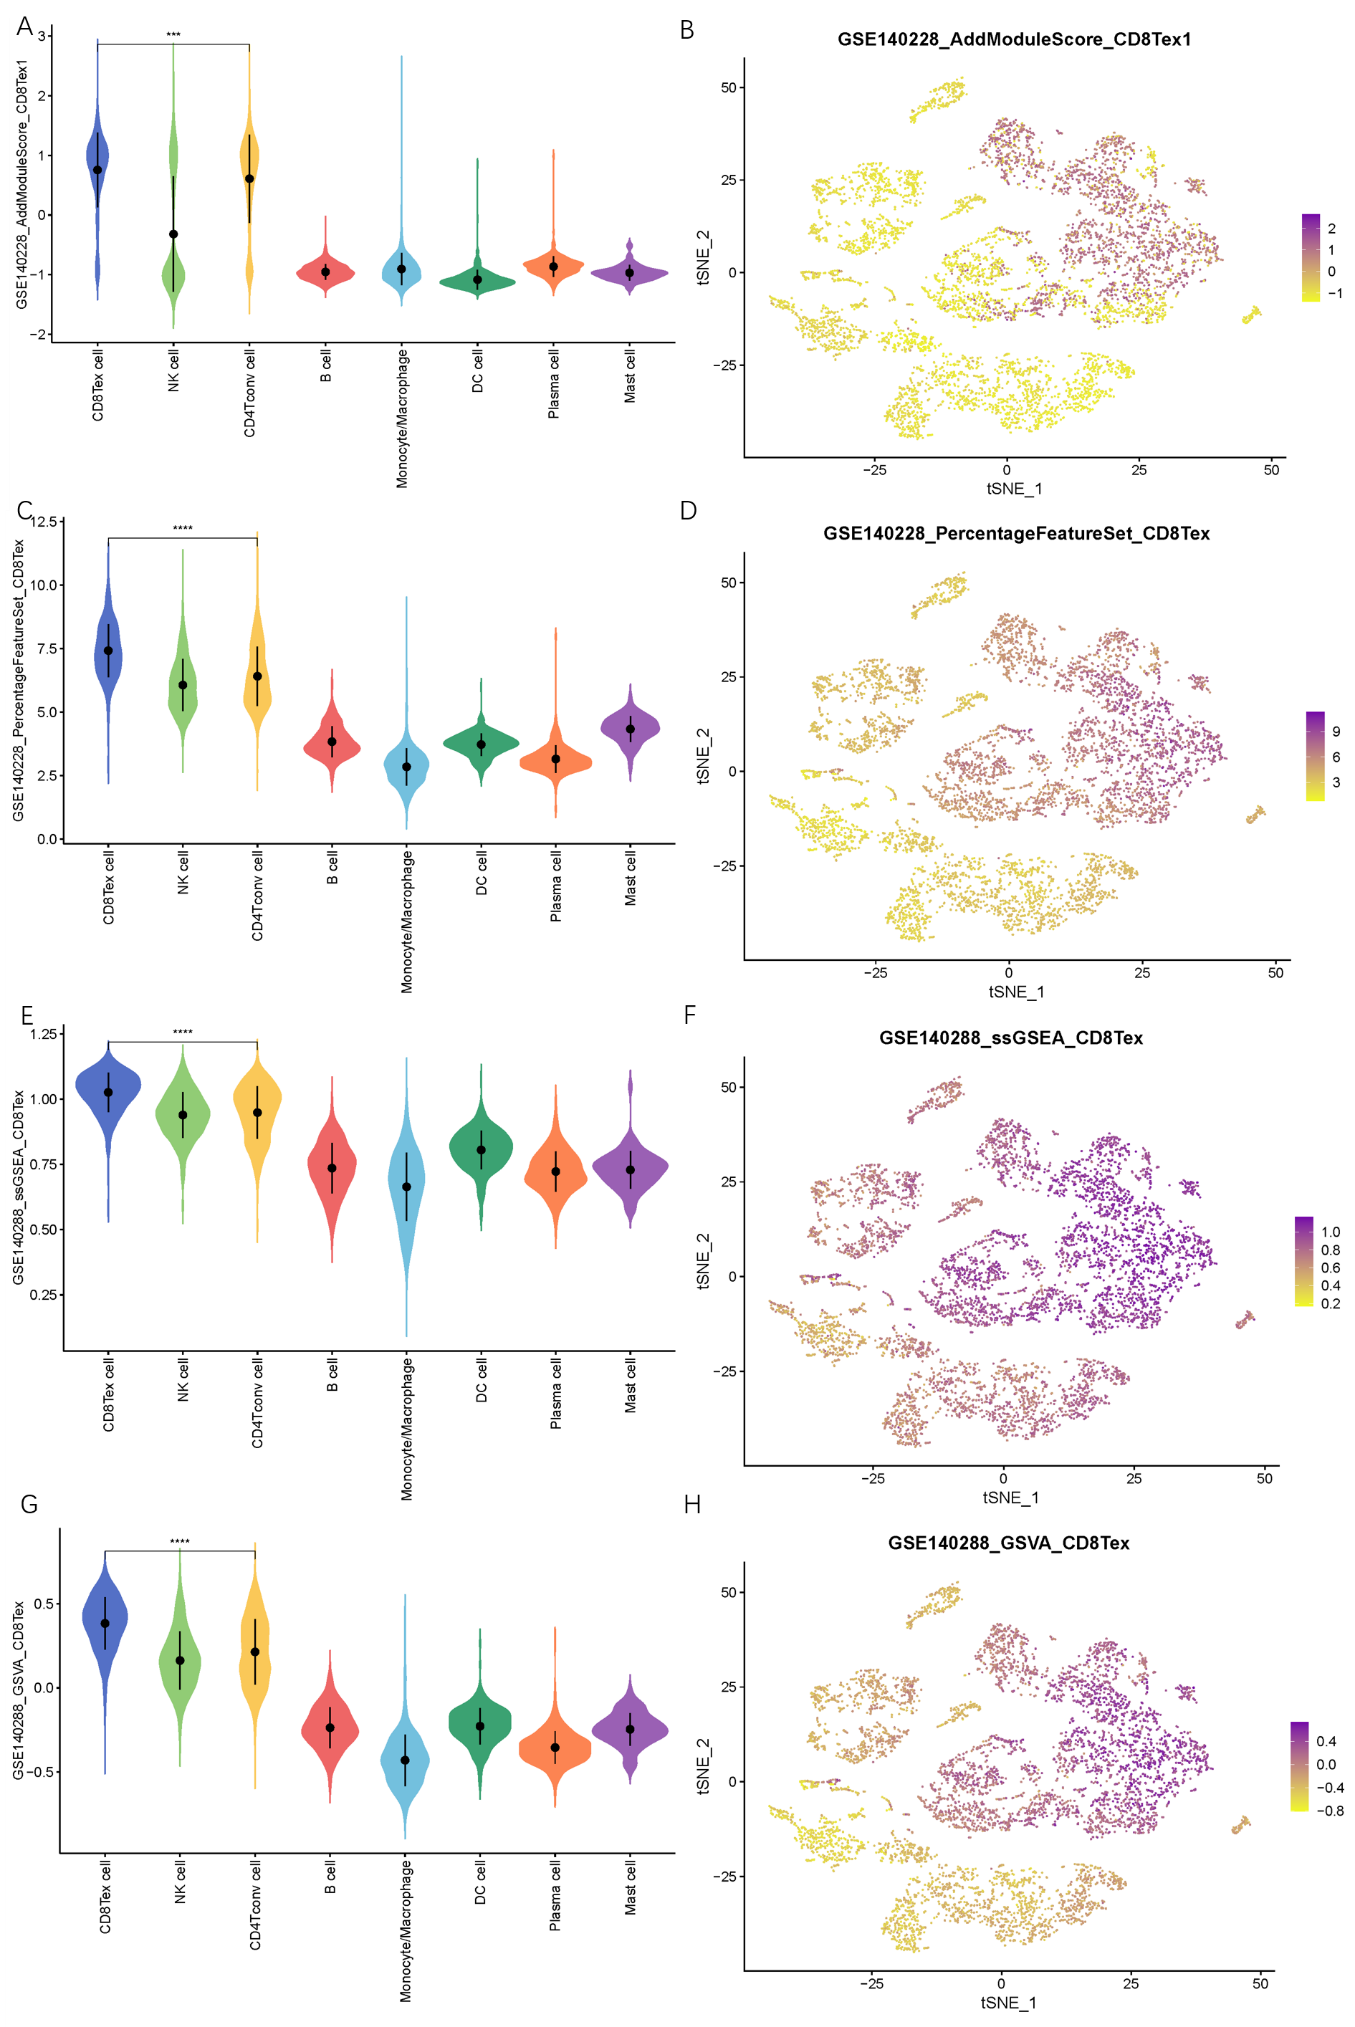
Supplementary Figure 5**

**CD8 Tex-related scores and feature plots of cell clusters in GSE140228 cohort.** (A-B) AddModuleScore algorithm. (C-D) PercentageFeatureSet algorithm. (E-F) ssGSEA algorithm. (G-H) GSVA algorithm. *** *P* < 0.001, **** *P* < 0.0001.

**
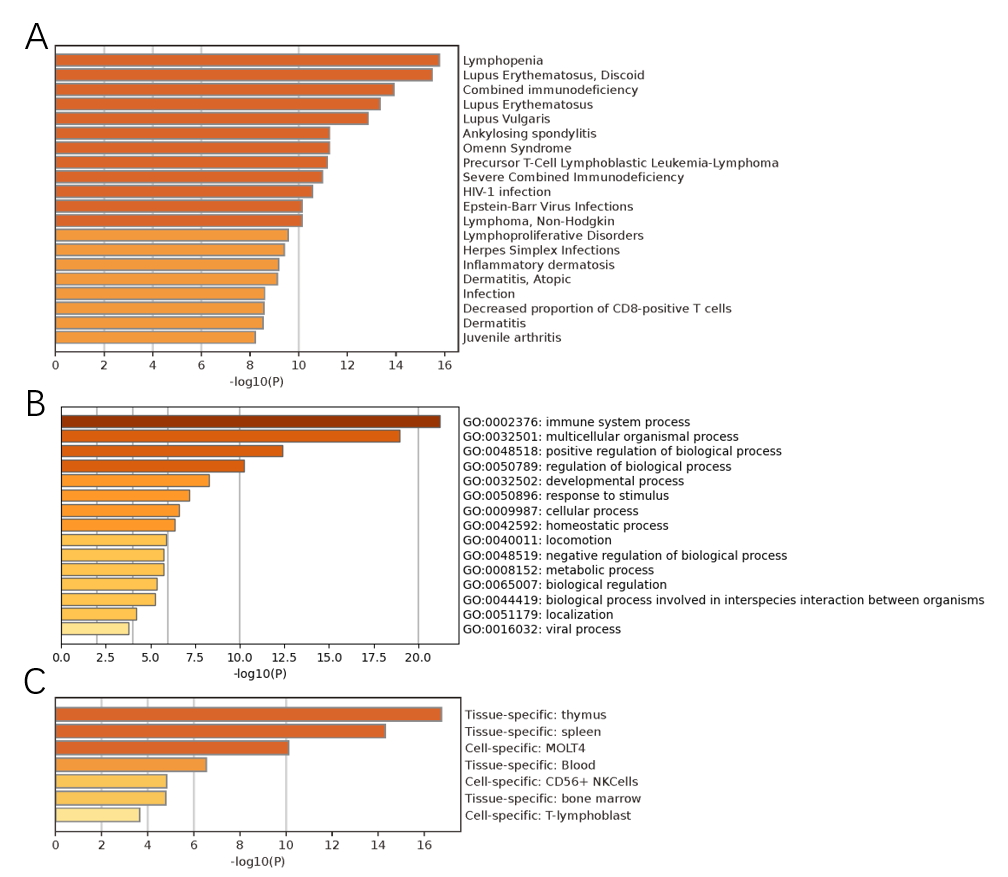
Supplementary Figure 6**

**Function enrichment analyses of CD8 Tex-related genes in Metascape database.** (A) Enrichment analysis in DisGeNET. (B) Enriched terms across CD8 Tex related genes in GO BP. (C) Enrichment analysis in PaGenBase.

**
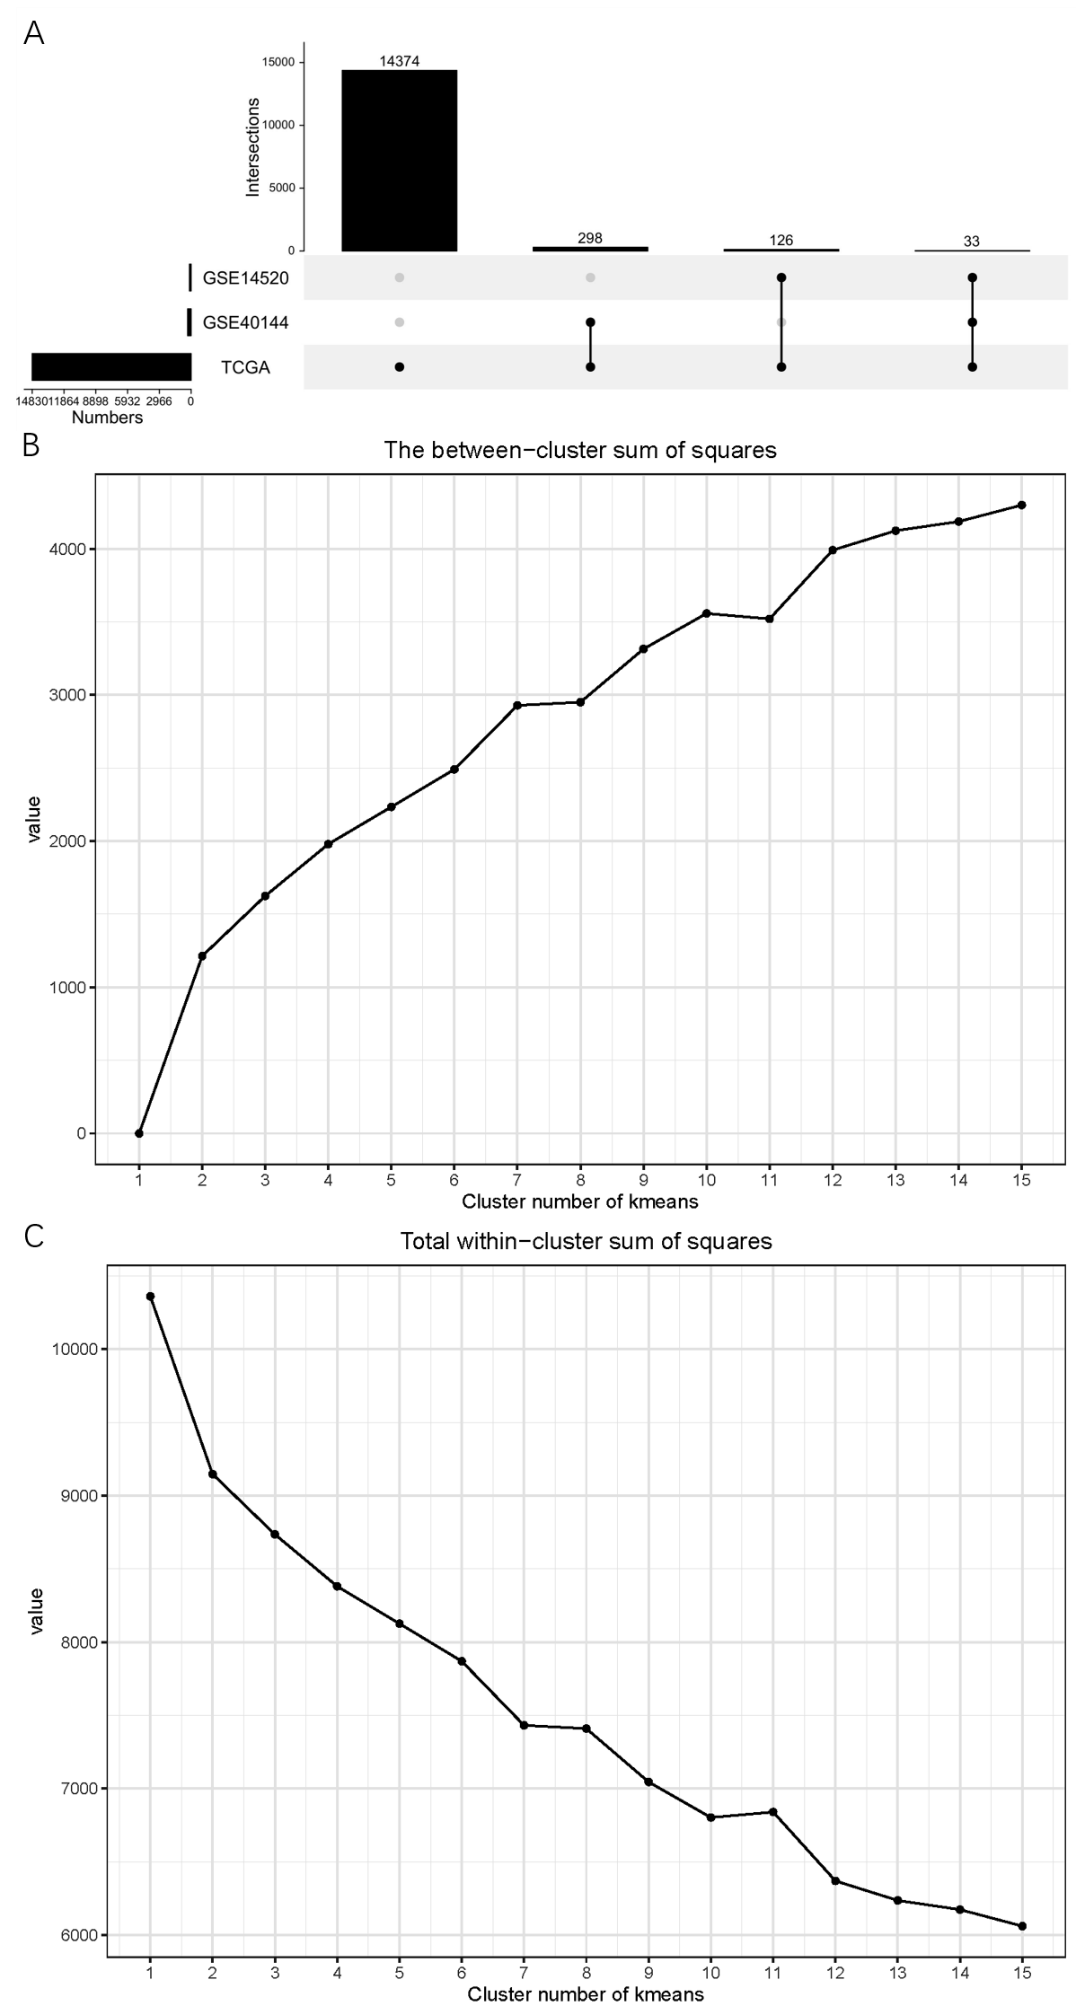
Supplementary Figure 7**

**UpSet plot and the optimal number of clusters.** (A) UpSet plot showed intersection of TCGA-LIHC, GSE40144 and GSE14520 cohort. (B-C) Between-cluster and within-cluster sum of squares in K-means cluster analysis. (B) Between-cluster sum of squares. (C) Within-cluster sum of squares.

**
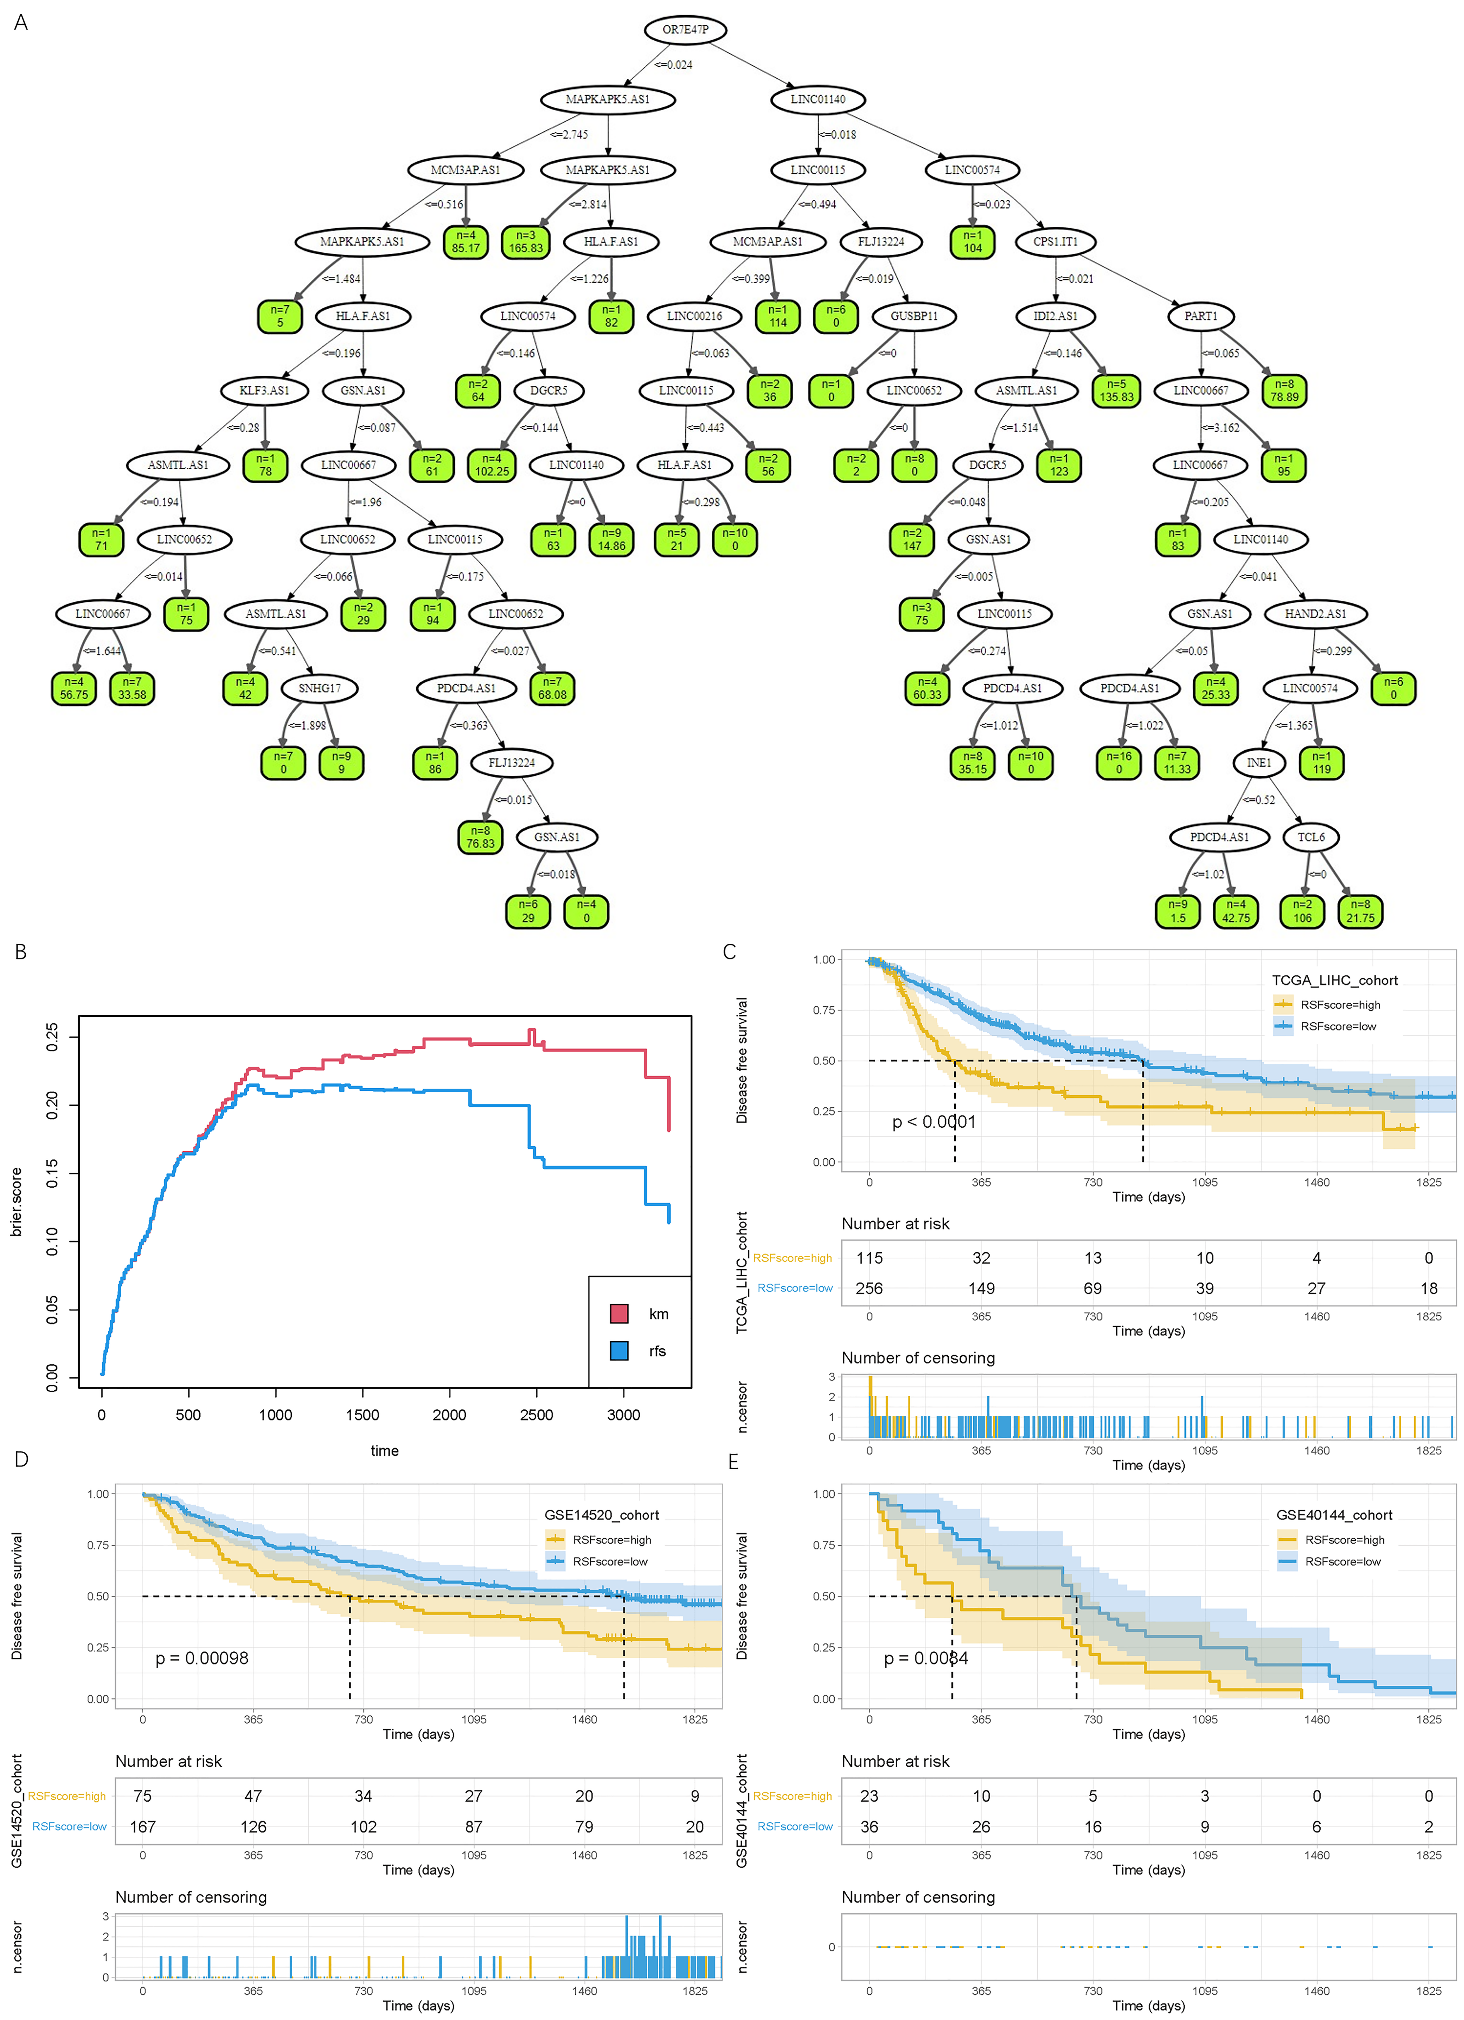
Supplementary Figure 8**

**This RSF model could predict recurrence risk of HCC.** (A) The tree structure of RSF model. (B) Relationships between brier.score and follow-up time in RFS model and KM model. (C-E) Recurrent risk difference between high- and low-score groups. (C) TCGA-LIHC cohort, (D) GSE14520 cohort and (E) GSE40144 cohort.

**Supplementary Figure 9**

**
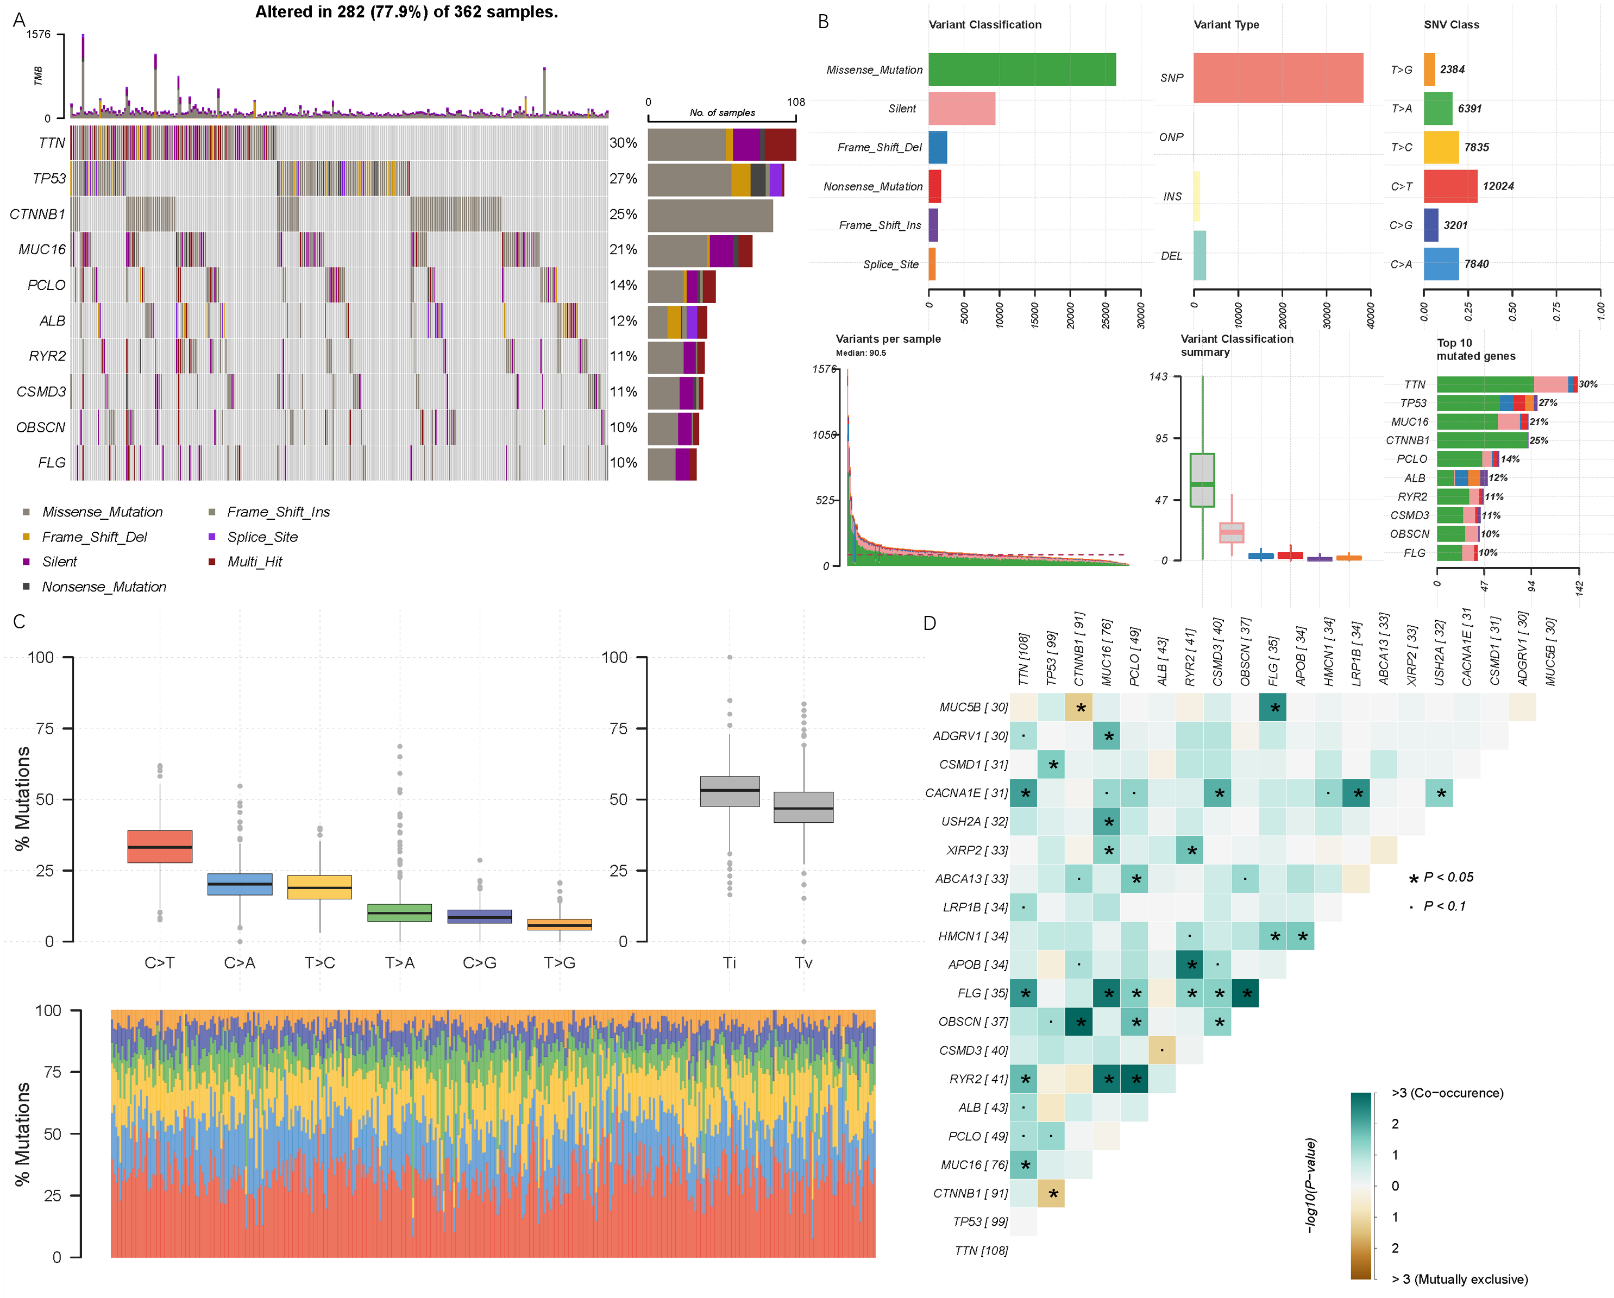
Mutation landscape of all TCGA-LIHC samples.** (A) Waterfall plot shows mutation frequencies and types of the top 10 most commonly mutated genes. (B) Summary of mutation status. (C) Single nucleotide mutation status. (D) Co-occurrence mutation and mutually exclusive status. * *P* < 0.05, ·, *P* < 0.1.

**Supplementary Tables**

**Supplementary Table 1**

Clinical information of patients in GSE125449 and GSE140228 cohorts

| ID | Age | Sex | Race | Etiology | Stage | Treatmentd | Treatment | Source |
| --- | --- | --- | --- | --- | --- | --- | --- | --- |
| H21 | 77 | Male | White | None | III | Resection | NO | Tumor |
| H30 | 63 | Male | Black | HCV | IV | Durvalumab/Tremelimumab | PD-L1/CTLA-4 | Tumor |
| H38 | 74 | Male | Asian | None | I | Resection | NO | Tumor |
| H18 | 61 | Male | White | HCV | IV | Durvalumab/Tremelimumab | PD-L1/CTLA-4 | Tumor |
| H37 | 65 | Male | Black | HCV | IV | Durvalumab/Tremelimumab | PD-L1/CTLA-4 | Tumor |
| H34 | 63 | Male | White | HCV | IV | Durvalumab/Tremelimumab | PD-L1/CTLA-4 | Tumor |
| H65 | 62 | Female | White | HCV | IV | Durvalumab/Tremelimumab | PD-L1/CTLA-4 | Tumor |
| H28 | 63 | Female | Black | HCV | III | Durvalumab/Tremelimumab | PD-L1/CTLA-4 | Tumor |
| H23 | 41 | Female | White | Fatty Liver | III | Durvalumab/Tremelimumab | PD-L1/CTLA-4 | Tumor |
| DSF22 | 49 | Male | Asian | HBV | IIIA | Resection | NO | Tumor, Normal, Blood |
| DSF27 | 84 | Female | Asian | None | IIIA | Resection | NO | Tumor, Blood |
| DSM22 | 32 | Male | Asian | HBV | I | Resection | NO | Tumor, Normal, Blood |
| DSM27 | 57 | Male | Asian | HBV | IIIA | Resection | NO | Tumor, Normal, Blood |
| DSA12 | 60 | Male | Asian | HBV | IIIA | Resection | NO | Tumor, Normal, Blood |
| DSN09 | 54 | Male | Asian | HBV | II | Resection | NO | Tumor, Normal, Blood, Lymphnode, Ascites |

**Supplementary Table 2**

The top 10 marker genes of different clusters and cell types in the two cohorts.

| Cohorts | Gene | p_val | avg_log2FC | pct.1 | pct.2 | p_val_adj | cluster |
| --- | --- | --- | --- | --- | --- | --- | --- |
| GSE125449 | RAMP2 | 0 | 2.786334 | 0.946 | 0.079 | 0 | 0 |
|  | PLVAP | 0 | 2.679852 | 0.895 | 0.092 | 0 | 0 |
|  | CLEC14A | 0 | 2.574479 | 0.88 | 0.059 | 0 | 0 |
|  | RBP7 | 0 | 2.571715 | 0.873 | 0.102 | 0 | 0 |
|  | HSPG2 | 0 | 2.480493 | 0.918 | 0.11 | 0 | 0 |
|  | CLDN5 | 0 | 2.455839 | 0.766 | 0.077 | 0 | 0 |
|  | EMCN | 0 | 2.422158 | 0.832 | 0.049 | 0 | 0 |
|  | RAMP3 | 0 | 2.420906 | 0.775 | 0.057 | 0 | 0 |
|  | FLT1 | 0 | 2.371173 | 0.798 | 0.058 | 0 | 0 |
|  | ECSCR | 0 | 2.331725 | 0.817 | 0.05 | 0 | 0 |
|  | IGHGP | 0 | 4.795005 | 0.988 | 0.084 | 0 | 1 |
|  | IGHG2 | 0 | 4.595053 | 0.986 | 0.044 | 0 | 1 |
|  | IGHG3 | 0 | 4.380692 | 0.998 | 0.217 | 0 | 1 |
|  | IGHG1 | 0 | 4.362632 | 0.993 | 0.123 | 0 | 1 |
|  | JCHAIN | 0 | 4.285484 | 0.984 | 0.073 | 0 | 1 |
|  | IGHG4 | 0 | 4.271615 | 0.995 | 0.158 | 0 | 1 |
|  | MZB1 | 0 | 3.980878 | 1 | 0.061 | 0 | 1 |
|  | IGKC | 0 | 3.953639 | 0.996 | 0.41 | 0 | 1 |
|  | IGLC2 | 0 | 3.817432 | 0.98 | 0.163 | 0 | 1 |
|  | IGLC3 | 0 | 3.352301 | 0.943 | 0.151 | 0 | 1 |
|  | NTS | 0 | 3.224136 | 0.811 | 0.006 | 0 | 2 |
|  | VCX2 | 0 | 3.070658 | 0.773 | 0.002 | 0 | 2 |
|  | SPINK1 | 0 | 3.033172 | 0.871 | 0.028 | 0 | 2 |
|  | CRP | 0 | 2.830129 | 0.707 | 0.014 | 0 | 2 |
|  | GPC3 | 0 | 2.622709 | 0.797 | 0.043 | 0 | 2 |
|  | MDK | 0 | 2.397786 | 0.957 | 0.201 | 0 | 2 |
|  | WFDC2 | 0 | 2.241335 | 0.625 | 0.007 | 0 | 2 |
|  | SERINC2 | 0 | 2.241028 | 0.846 | 0.099 | 0 | 2 |
|  | TFF2 | 0 | 2.174581 | 0.623 | 0.001 | 0 | 2 |
|  | FXYD2 | 0 | 2.107161 | 0.576 | 0.01 | 0 | 2 |
|  | IL7R | 1.98E-279 | 2.822038 | 0.606 | 0.047 | 3.43E-275 | 3 |
|  | CD3D | 2.24E-241 | 2.548733 | 0.746 | 0.123 | 3.88E-237 | 3 |
|  | LTB | 3.62E-223 | 2.759245 | 0.711 | 0.123 | 6.28E-219 | 3 |
|  | CD52 | 1.50E-218 | 2.469879 | 0.863 | 0.248 | 2.60E-214 | 3 |
|  | TRAC | 2.22E-216 | 2.51902 | 0.666 | 0.103 | 3.85E-212 | 3 |
|  | CD2 | 3.62E-215 | 2.440831 | 0.594 | 0.071 | 6.28E-211 | 3 |
|  | KLRB1 | 2.64E-204 | 2.912903 | 0.594 | 0.082 | 4.57E-200 | 3 |
|  | S100A4 | 5.63E-195 | 2.184849 | 0.893 | 0.343 | 9.77E-191 | 3 |
|  | RPS29 | 2.17E-183 | 1.010326 | 0.985 | 0.943 | 3.77E-179 | 3 |
|  | IL32 | 9.10E-180 | 1.820562 | 0.93 | 0.505 | 1.58E-175 | 3 |
|  | ALDOB | 0 | 3.394982 | 0.954 | 0.085 | 0 | 4 |
|  | SDS | 0 | 3.118798 | 0.891 | 0.047 | 0 | 4 |
|  | HRG | 0 | 3.082915 | 0.906 | 0.048 | 0 | 4 |
|  | TAT | 0 | 3.060338 | 0.839 | 0.032 | 0 | 4 |
|  | SERPINC1 | 0 | 3.044018 | 0.967 | 0.124 | 0 | 4 |
|  | CYP3A5 | 0 | 3.034781 | 0.945 | 0.122 | 0 | 4 |
|  | ANG | 0 | 2.921169 | 0.951 | 0.147 | 0 | 4 |
|  | KNG1 | 0 | 2.919844 | 0.957 | 0.146 | 0 | 4 |
|  | HPX | 0 | 2.9027 | 0.954 | 0.143 | 0 | 4 |
|  | AGXT | 0 | 2.865248 | 0.918 | 0.097 | 0 | 4 |
|  | ASPN | 8.92E-283 | 2.622086 | 0.642 | 0.045 | 1.55E-278 | 5 |
|  | RGS5 | 8.05E-271 | 2.815923 | 0.965 | 0.199 | 1.40E-266 | 5 |
|  | BGN | 2.34E-254 | 2.419658 | 0.904 | 0.162 | 4.06E-250 | 5 |
|  | PDGFRB | 3.06E-233 | 2.259707 | 0.725 | 0.09 | 5.30E-229 | 5 |
|  | DCN | 2.82E-220 | 2.24466 | 0.706 | 0.089 | 4.89E-216 | 5 |
|  | HIGD1B | 4.96E-220 | 2.294391 | 0.69 | 0.084 | 8.61E-216 | 5 |
|  | TPM2 | 7.92E-215 | 2.226786 | 0.907 | 0.181 | 1.37E-210 | 5 |
|  | MYL9 | 4.50E-214 | 2.278564 | 0.965 | 0.243 | 7.80E-210 | 5 |
|  | LHFP | 1.06E-212 | 2.24773 | 0.827 | 0.164 | 1.84E-208 | 5 |
|  | MFGE8 | 5.24E-211 | 2.184227 | 0.872 | 0.176 | 9.10E-207 | 5 |
|  | AIF1 | 0 | 3.602647 | 0.983 | 0.034 | 0 | 6 |
|  | TYROBP | 0 | 3.482522 | 0.944 | 0.081 | 0 | 6 |
|  | FCER1G | 0 | 3.358315 | 0.913 | 0.046 | 0 | 6 |
|  | HLA-DQB1 | 0 | 3.017235 | 0.892 | 0.107 | 0 | 6 |
|  | LST1 | 0 | 2.990511 | 0.881 | 0.045 | 0 | 6 |
|  | HLA-DQA1 | 0 | 2.990361 | 0.822 | 0.067 | 0 | 6 |
|  | MS4A6A | 0 | 2.944422 | 0.727 | 0.022 | 0 | 6 |
|  | IL1B | 0 | 2.939417 | 0.608 | 0.02 | 0 | 6 |
|  | MS4A7 | 0 | 2.711147 | 0.661 | 0.013 | 0 | 6 |
|  | HLA-DMB | 0 | 2.635076 | 0.738 | 0.037 | 0 | 6 |
|  | MYH11 | 0 | 2.913926 | 0.947 | 0.061 | 0 | 7 |
|  | RERGL | 0 | 2.390989 | 0.729 | 0.02 | 0 | 7 |
|  | CASQ2 | 2.47E-303 | 2.009144 | 0.638 | 0.022 | 4.29E-299 | 7 |
|  | PLN | 1.40E-298 | 2.434961 | 0.75 | 0.039 | 2.43E-294 | 7 |
|  | CNN1 | 5.93E-257 | 2.152725 | 0.644 | 0.032 | 1.03E-252 | 7 |
|  | KCNA5 | 6.51E-257 | 1.61738 | 0.457 | 0.01 | 1.13E-252 | 7 |
|  | LMOD1 | 2.66E-249 | 2.031009 | 0.686 | 0.041 | 4.61E-245 | 7 |
|  | GPR20 | 1.99E-247 | 1.858925 | 0.644 | 0.034 | 3.46E-243 | 7 |
|  | FRZB | 1.11E-241 | 2.503542 | 0.979 | 0.119 | 1.93E-237 | 7 |
|  | SMOC2 | 1.84E-241 | 2.206092 | 0.819 | 0.071 | 3.20E-237 | 7 |
|  | CD8A | 2.77E-200 | 2.176579 | 0.524 | 0.027 | 4.80E-196 | 8 |
|  | GZMA | 1.71E-165 | 2.421249 | 0.706 | 0.079 | 2.96E-161 | 8 |
|  | CD3G | 1.13E-158 | 1.949505 | 0.62 | 0.056 | 1.96E-154 | 8 |
|  | SH2D1A | 2.29E-158 | 1.761596 | 0.433 | 0.023 | 3.97E-154 | 8 |
|  | CD8B | 6.51E-157 | 1.897889 | 0.385 | 0.017 | 1.13E-152 | 8 |
|  | CD3E | 1.89E-150 | 1.90997 | 0.727 | 0.084 | 3.28E-146 | 8 |
|  | CD2 | 3.08E-149 | 2.057798 | 0.749 | 0.094 | 5.35E-145 | 8 |
|  | NKG7 | 2.63E-148 | 2.445335 | 0.701 | 0.093 | 4.56E-144 | 8 |
|  | CD3D | 8.41E-147 | 2.111714 | 0.893 | 0.152 | 1.46E-142 | 8 |
|  | CCL5 | 1.50E-141 | 2.440574 | 0.802 | 0.138 | 2.61E-137 | 8 |
|  | FAM162B | 4.35E-108 | 1.007203 | 0.664 | 0.071 | 7.54E-104 | 9 |
|  | AQP1 | 7.51E-103 | 1.628187 | 0.888 | 0.148 | 1.30E-98 | 9 |
|  | COL9A1 | 2.26E-102 | 0.762058 | 0.381 | 0.023 | 3.92E-98 | 9 |
|  | PTPRB | 2.80E-100 | 1.493085 | 0.828 | 0.125 | 4.86E-96 | 9 |
|  | HIGD1B | 2.52E-99 | 1.339824 | 0.784 | 0.11 | 4.37E-95 | 9 |
|  | COX4I2 | 7.52E-99 | 1.258108 | 0.791 | 0.109 | 1.31E-94 | 9 |
|  | PTN | 1.49E-94 | 1.312817 | 0.679 | 0.089 | 2.59E-90 | 9 |
|  | CD34 | 5.14E-93 | 1.47163 | 0.851 | 0.141 | 8.92E-89 | 9 |
|  | PODXL | 1.88E-92 | 1.386324 | 0.851 | 0.138 | 3.26E-88 | 9 |
|  | ADGRL4 | 8.32E-92 | 1.346958 | 0.836 | 0.131 | 1.44E-87 | 9 |
|  | C9 | 2.27E-293 | 1.91293 | 0.432 | 0.002 | 3.94E-289 | 10 |
|  | SLCO1B1 | 1.59E-291 | 2.12685 | 0.659 | 0.013 | 2.76E-287 | 10 |
|  | CFHR2 | 5.54E-259 | 1.852372 | 0.511 | 0.007 | 9.61E-255 | 10 |
|  | AKR1B10 | 2.18E-186 | 2.48288 | 0.625 | 0.025 | 3.79E-182 | 10 |
|  | RDH16 | 8.05E-169 | 1.97301 | 0.432 | 0.011 | 1.40E-164 | 10 |
|  | LGALS4 | 1.92E-159 | 2.494707 | 0.795 | 0.058 | 3.33E-155 | 10 |
|  | CFHR5 | 8.22E-136 | 1.617034 | 0.455 | 0.017 | 1.43E-131 | 10 |
|  | AKR1C1 | 2.19E-133 | 2.588532 | 0.852 | 0.085 | 3.81E-129 | 10 |
|  | GSTA2 | 1.77E-128 | 2.468821 | 0.761 | 0.065 | 3.08E-124 | 10 |
|  | SAA2 | 4.60E-126 | 2.564597 | 0.443 | 0.019 | 7.98E-122 | 10 |
|  | REG3A | 0 | 3.718389 | 0.929 | 0.015 | 0 | 11 |
|  | CYP2E1 | 0 | 3.548484 | 0.964 | 0.013 | 0 | 11 |
|  | ALDH3A1 | 0 | 3.274367 | 0.869 | 0.002 | 0 | 11 |
|  | LINC01474 | 0 | 2.899892 | 0.786 | 0.003 | 0 | 11 |
|  | AKR1B10 | 0 | 2.789518 | 0.845 | 0.02 | 0 | 11 |
|  | RHBG | 0 | 2.759945 | 0.798 | 0.004 | 0 | 11 |
|  | PART1 | 0 | 2.306417 | 0.667 | 0.005 | 0 | 11 |
|  | ACTN2 | 0 | 1.949453 | 0.548 | 0.005 | 0 | 11 |
|  | ODAM | 0 | 1.787828 | 0.56 | 0.001 | 0 | 11 |
|  | LINC01287 | 0 | 1.188497 | 0.429 | 0.001 | 0 | 11 |
|  | MS4A1 | 1.45E-199 | 2.599308 | 0.422 | 0.005 | 2.52E-195 | 12 |
|  | BANK1 | 5.86E-83 | 2.000291 | 0.312 | 0.011 | 1.02E-78 | 12 |
|  | CD79A | 1.20E-47 | 1.963153 | 0.812 | 0.143 | 2.08E-43 | 12 |
|  | CLECL1 | 7.83E-29 | 1.375776 | 0.266 | 0.027 | 1.36E-24 | 12 |
|  | POU2F2 | 7.38E-27 | 1.615178 | 0.438 | 0.075 | 1.28E-22 | 12 |
|  | HLA-DPB1 | 1.51E-23 | 1.724118 | 0.75 | 0.255 | 2.61E-19 | 12 |
|  | CD83 | 6.01E-23 | 1.726872 | 0.531 | 0.13 | 1.04E-18 | 12 |
|  | CD79B | 1.62E-22 | 1.673338 | 0.516 | 0.13 | 2.81E-18 | 12 |
|  | HLA-DQA1 | 3.26E-22 | 1.76242 | 0.5 | 0.117 | 5.66E-18 | 12 |
|  | CD37 | 7.72E-22 | 1.536398 | 0.641 | 0.184 | 1.34E-17 | 12 |
|  | MYBL2 | 4.82E-36 | 1.342607 | 0.31 | 0.02 | 8.37E-32 | 13 |
|  | RP11-1070N10.3 | 3.66E-33 | 1.34135 | 0.286 | 0.018 | 6.34E-29 | 13 |
|  | MZB1 | 3.20E-30 | 2.049842 | 0.905 | 0.191 | 5.55E-26 | 13 |
|  | MKI67 | 3.43E-26 | 1.238858 | 0.381 | 0.041 | 5.95E-22 | 13 |
|  | RRM2 | 9.34E-26 | 1.318825 | 0.333 | 0.033 | 1.62E-21 | 13 |
|  | SPC25 | 7.58E-25 | 0.966584 | 0.262 | 0.021 | 1.32E-20 | 13 |
|  | KIAA0125 | 2.71E-24 | 1.61772 | 0.262 | 0.021 | 4.71E-20 | 13 |
|  | UBE2C | 1.28E-21 | 1.379251 | 0.381 | 0.049 | 2.23E-17 | 13 |
|  | HBA2 | 4.20E-20 | 2.385856 | 0.619 | 0.154 | 7.29E-16 | 13 |
|  | JCHAIN | 6.30E-20 | 1.46206 | 0.81 | 0.2 | 1.09E-15 | 13 |
|  | EFEMP1 | 0 | 3.217472 | 0.971 | 0.014 | 0 | 14 |
|  | LTBP2 | 0 | 2.292658 | 0.8 | 0.007 | 0 | 14 |
|  | SHISA3 | 0 | 2.003787 | 0.629 | 0.002 | 0 | 14 |
|  | PODN | 0 | 1.992042 | 0.714 | 0.004 | 0 | 14 |
|  | ISLR | 8.81E-263 | 1.745687 | 0.571 | 0.004 | 1.53E-258 | 14 |
|  | THBS2 | 3.98E-262 | 2.782521 | 0.943 | 0.017 | 6.90E-258 | 14 |
|  | OMD | 2.14E-232 | 1.097992 | 0.4 | 0.002 | 3.71E-228 | 14 |
|  | MMP23B | 1.84E-227 | 2.021867 | 0.743 | 0.012 | 3.20E-223 | 14 |
|  | HTR2B | 3.31E-214 | 1.067436 | 0.343 | 0.001 | 5.74E-210 | 14 |
|  | DPT | 1.88E-213 | 1.664245 | 0.429 | 0.003 | 3.26E-209 | 14 |
|  | RAMP2 | 0 | 2.786334 | 0.946 | 0.079 | 0 | Endothelial cell |
|  | PLVAP | 0 | 2.679852 | 0.895 | 0.092 | 0 | Endothelial cell |
|  | CLEC14A | 0 | 2.574479 | 0.88 | 0.059 | 0 | Endothelial cell |
|  | RBP7 | 0 | 2.571715 | 0.873 | 0.102 | 0 | Endothelial cell |
|  | HSPG2 | 0 | 2.480493 | 0.918 | 0.11 | 0 | Endothelial cell |
|  | CLDN5 | 0 | 2.455839 | 0.766 | 0.077 | 0 | Endothelial cell |
|  | EMCN | 0 | 2.422158 | 0.832 | 0.049 | 0 | Endothelial cell |
|  | RAMP3 | 0 | 2.420906 | 0.775 | 0.057 | 0 | Endothelial cell |
|  | FLT1 | 0 | 2.371173 | 0.798 | 0.058 | 0 | Endothelial cell |
|  | ECSCR | 0 | 2.331725 | 0.817 | 0.05 | 0 | Endothelial cell |
|  | IGHGP | 0 | 4.795005 | 0.988 | 0.084 | 0 | Plasma cell |
|  | IGHG2 | 0 | 4.595053 | 0.986 | 0.044 | 0 | Plasma cell |
|  | IGHG3 | 0 | 4.380692 | 0.998 | 0.217 | 0 | Plasma cell |
|  | IGHG1 | 0 | 4.362632 | 0.993 | 0.123 | 0 | Plasma cell |
|  | JCHAIN | 0 | 4.285484 | 0.984 | 0.073 | 0 | Plasma cell |
|  | IGHG4 | 0 | 4.271615 | 0.995 | 0.158 | 0 | Plasma cell |
|  | MZB1 | 0 | 3.980878 | 1 | 0.061 | 0 | Plasma cell |
|  | IGKC | 0 | 3.953639 | 0.996 | 0.41 | 0 | Plasma cell |
|  | IGLC2 | 0 | 3.817432 | 0.98 | 0.163 | 0 | Plasma cell |
|  | IGLC3 | 0 | 3.352301 | 0.943 | 0.151 | 0 | Plasma cell |
|  | TF | 0 | 2.74678 | 0.93 | 0.107 | 0 | Malignant cell |
|  | GC | 0 | 2.655138 | 0.86 | 0.089 | 0 | Malignant cell |
|  | NTS | 0 | 2.593807 | 0.493 | 0.006 | 0 | Malignant cell |
|  | ORM1 | 0 | 2.519787 | 0.829 | 0.119 | 0 | Malignant cell |
|  | TM4SF4 | 0 | 2.484177 | 0.787 | 0.061 | 0 | Malignant cell |
|  | VCX2 | 0 | 2.457194 | 0.471 | 0.002 | 0 | Malignant cell |
|  | CYP3A5 | 0 | 2.444698 | 0.66 | 0.061 | 0 | Malignant cell |
|  | VTN | 0 | 2.412179 | 0.854 | 0.145 | 0 | Malignant cell |
|  | F2 | 0 | 2.379755 | 0.738 | 0.087 | 0 | Malignant cell |
|  | SERPINA5 | 0 | 2.369018 | 0.734 | 0.031 | 0 | Malignant cell |
|  | CD3D | 0 | 2.896542 | 0.744 | 0.079 | 0 | CD8Tex cell |
|  | TRAC | 0 | 2.804913 | 0.673 | 0.061 | 0 | CD8Tex cell |
|  | CD2 | 0 | 2.76285 | 0.603 | 0.032 | 0 | CD8Tex cell |
|  | CD3E | 0 | 2.505405 | 0.548 | 0.031 | 0 | CD8Tex cell |
|  | CD52 | 3.45E-307 | 2.575218 | 0.846 | 0.208 | 5.98E-303 | CD8Tex cell |
|  | PTPRC | 1.72E-287 | 2.42624 | 0.719 | 0.12 | 2.98E-283 | CD8Tex cell |
|  | CORO1A | 5.20E-267 | 2.281242 | 0.735 | 0.151 | 9.03E-263 | CD8Tex cell |
|  | S100A4 | 4.49E-260 | 2.220696 | 0.87 | 0.309 | 7.79E-256 | CD8Tex cell |
|  | IL7R | 4.60E-246 | 2.571128 | 0.471 | 0.034 | 7.99E-242 | CD8Tex cell |
|  | CD3G | 8.90E-246 | 2.221376 | 0.416 | 0.018 | 1.55E-241 | CD8Tex cell |
|  | RGS5 | 0 | 3.420555 | 0.951 | 0.115 | 0 | Fibroblast |
|  | TAGLN | 0 | 3.275832 | 0.934 | 0.105 | 0 | Fibroblast |
|  | ACTA2 | 0 | 3.070153 | 0.921 | 0.146 | 0 | Fibroblast |
|  | TPM2 | 0 | 2.98885 | 0.919 | 0.096 | 0 | Fibroblast |
|  | MYL9 | 0 | 2.951671 | 0.973 | 0.16 | 0 | Fibroblast |
|  | BGN | 0 | 2.85787 | 0.924 | 0.075 | 0 | Fibroblast |
|  | FRZB | 0 | 2.787448 | 0.824 | 0.021 | 0 | Fibroblast |
|  | MFGE8 | 0 | 2.661255 | 0.894 | 0.093 | 0 | Fibroblast |
|  | PLAC9 | 0 | 2.560573 | 0.852 | 0.074 | 0 | Fibroblast |
|  | CRISPLD2 | 0 | 2.557825 | 0.743 | 0.029 | 0 | Fibroblast |
|  | AIF1 | 0 | 3.602647 | 0.983 | 0.034 | 0 | Monocyte/Macrophage |
|  | TYROBP | 0 | 3.482522 | 0.944 | 0.081 | 0 | Monocyte/Macrophage |
|  | FCER1G | 0 | 3.358315 | 0.913 | 0.046 | 0 | Monocyte/Macrophage |
|  | HLA-DQB1 | 0 | 3.017235 | 0.892 | 0.107 | 0 | Monocyte/Macrophage |
|  | LST1 | 0 | 2.990511 | 0.881 | 0.045 | 0 | Monocyte/Macrophage |
|  | HLA-DQA1 | 0 | 2.990361 | 0.822 | 0.067 | 0 | Monocyte/Macrophage |
|  | MS4A6A | 0 | 2.944422 | 0.727 | 0.022 | 0 | Monocyte/Macrophage |
|  | IL1B | 0 | 2.939417 | 0.608 | 0.02 | 0 | Monocyte/Macrophage |
|  | MS4A7 | 0 | 2.711147 | 0.661 | 0.013 | 0 | Monocyte/Macrophage |
|  | HLA-DMB | 0 | 2.635076 | 0.738 | 0.037 | 0 | Monocyte/Macrophage |
|  | CYP2E1 | 0 | 2.858182 | 0.547 | 0.01 | 0 | Hepatic progenitor cell |
|  | AKR1B10 | 0 | 2.828536 | 0.733 | 0.006 | 0 | Hepatic progenitor cell |
|  | ALDH3A1 | 0 | 2.411789 | 0.448 | 0.001 | 0 | Hepatic progenitor cell |
|  | CFHR5 | 0 | 1.999238 | 0.564 | 0.002 | 0 | Hepatic progenitor cell |
|  | RHBG | 8.92E-298 | 1.961199 | 0.419 | 0.003 | 1.55E-293 | Hepatic progenitor cell |
|  | REG3A | 7.80E-278 | 2.92418 | 0.517 | 0.012 | 1.35E-273 | Hepatic progenitor cell |
|  | LINC01474 | 5.97E-275 | 2.058325 | 0.39 | 0.003 | 1.04E-270 | Hepatic progenitor cell |
|  | AKR1C1 | 6.73E-272 | 2.826889 | 0.86 | 0.067 | 1.17E-267 | Hepatic progenitor cell |
|  | AKR1C2 | 1.20E-268 | 2.533982 | 0.797 | 0.054 | 2.09E-264 | Hepatic progenitor cell |
|  | GSTA2 | 2.93E-256 | 2.506485 | 0.767 | 0.049 | 5.08E-252 | Hepatic progenitor cell |
|  | MS4A1 | 1.45E-199 | 2.599308 | 0.422 | 0.005 | 2.52E-195 | B cell |
|  | BANK1 | 5.86E-83 | 2.000291 | 0.312 | 0.011 | 1.02E-78 | B cell |
|  | CD79A | 1.20E-47 | 1.963153 | 0.812 | 0.143 | 2.08E-43 | B cell |
|  | CLECL1 | 7.83E-29 | 1.375776 | 0.266 | 0.027 | 1.36E-24 | B cell |
|  | POU2F2 | 7.38E-27 | 1.615178 | 0.438 | 0.075 | 1.28E-22 | B cell |
|  | HLA-DPB1 | 1.51E-23 | 1.724118 | 0.75 | 0.255 | 2.61E-19 | B cell |
|  | CD83 | 6.01E-23 | 1.726872 | 0.531 | 0.13 | 1.04E-18 | B cell |
|  | CD79B | 1.62E-22 | 1.673338 | 0.516 | 0.13 | 2.81E-18 | B cell |
|  | HLA-DQA1 | 3.26E-22 | 1.76242 | 0.5 | 0.117 | 5.66E-18 | B cell |
|  | CD37 | 7.72E-22 | 1.536398 | 0.641 | 0.184 | 1.34E-17 | B cell |
| GSE140228 | CD8A | 2.18E-289 | 2.065945 | 0.882 | 0.365 | 7.20E-285 | 0 |
|  | CTD-2313F11.1 | 9.13E-288 | 1.815268 | 0.872 | 0.339 | 3.02E-283 | 0 |
|  | GZMK | 1.38E-279 | 1.894165 | 0.881 | 0.371 | 4.56E-275 | 0 |
|  | CD3D | 4.78E-264 | 1.393069 | 0.957 | 0.385 | 1.58E-259 | 0 |
|  | ANAPC1P1 | 1.44E-257 | 0.560559 | 0.537 | 0.09 | 4.77E-253 | 0 |
|  | CD8B | 1.13E-245 | 1.649306 | 0.708 | 0.204 | 3.72E-241 | 0 |
|  | TRGJ1 | 1.46E-234 | 0.29905 | 0.583 | 0.118 | 4.82E-230 | 0 |
|  | CCL5 | 9.23E-230 | 1.440265 | 0.997 | 0.663 | 3.05E-225 | 0 |
|  | CD3E | 2.99E-213 | 1.158761 | 0.951 | 0.41 | 9.88E-209 | 0 |
|  | CD3G | 2.38E-211 | 1.333443 | 0.918 | 0.423 | 7.86E-207 | 0 |
|  | XCL1 | 3.42E-264 | 1.297866 | 0.696 | 0.144 | 1.13E-259 | 1 |
|  | KLRD1 | 5.50E-227 | 1.799754 | 0.985 | 0.523 | 1.82E-222 | 1 |
|  | KLRC2 | 2.41E-224 | 0.999015 | 0.755 | 0.193 | 7.99E-220 | 1 |
|  | RP11-277P12.20 | 1.38E-217 | 1.17904 | 0.936 | 0.357 | 4.58E-213 | 1 |
|  | XCL2 | 2.61E-209 | 1.122512 | 0.648 | 0.149 | 8.63E-205 | 1 |
|  | KLRC4-KLRK1 | 1.16E-190 | 1.448103 | 0.985 | 0.595 | 3.84E-186 | 1 |
|  | KLRK1 | 9.52E-190 | 1.447712 | 0.985 | 0.59 | 3.15E-185 | 1 |
|  | CD160 | 2.01E-182 | 1.799036 | 0.653 | 0.192 | 6.67E-178 | 1 |
|  | NKG7 | 2.62E-181 | 1.438394 | 0.997 | 0.61 | 8.66E-177 | 1 |
|  | CCL4 | 5.16E-178 | 1.471156 | 0.978 | 0.665 | 1.71E-173 | 1 |
|  | IL7R | 8.61E-211 | 1.782176 | 0.978 | 0.572 | 2.85E-206 | 2 |
|  | ICOS | 1.77E-196 | 1.621619 | 0.7 | 0.197 | 5.86E-192 | 2 |
|  | CD28 | 7.90E-189 | 1.33615 | 0.728 | 0.211 | 2.61E-184 | 2 |
|  | CD40LG | 1.69E-177 | 1.500948 | 0.57 | 0.133 | 5.58E-173 | 2 |
|  | TNFRSF25 | 7.09E-155 | 1.144033 | 0.521 | 0.121 | 2.34E-150 | 2 |
|  | TRAC | 1.51E-153 | 1.268474 | 0.985 | 0.578 | 5.01E-149 | 2 |
|  | ESPN | 1.50E-151 | 0.294094 | 0.45 | 0.088 | 4.97E-147 | 2 |
|  | SPOCK2 | 4.25E-148 | 1.242522 | 0.866 | 0.398 | 1.41E-143 | 2 |
|  | RNU1-125P | 7.71E-139 | 0.639723 | 0.969 | 0.43 | 2.55E-134 | 2 |
|  | INPP4B | 2.41E-129 | 1.213812 | 0.786 | 0.334 | 7.96E-125 | 2 |
|  | MS4A1 | 0 | 2.934021 | 0.991 | 0.365 | 0 | 3 |
|  | BANK1 | 0 | 2.743469 | 0.975 | 0.212 | 0 | 3 |
|  | CD79A | 0 | 2.500568 | 0.993 | 0.298 | 0 | 3 |
|  | FCRLA | 0 | 2.187229 | 0.733 | 0.09 | 0 | 3 |
|  | LINC00926 | 0 | 2.094346 | 0.837 | 0.094 | 0 | 3 |
|  | BLK | 0 | 2.081439 | 0.864 | 0.08 | 0 | 3 |
|  | CD22 | 0 | 2.012794 | 0.842 | 0.126 | 0 | 3 |
|  | TNFRSF13C | 0 | 1.939066 | 0.917 | 0.117 | 0 | 3 |
|  | CD19 | 0 | 1.908835 | 0.726 | 0.11 | 0 | 3 |
|  | BCL11A | 0 | 1.901196 | 0.86 | 0.174 | 0 | 3 |
|  | C1QB | 0 | 2.745983 | 0.9 | 0.209 | 0 | 4 |
|  | C1QA | 0 | 2.650722 | 0.911 | 0.214 | 0 | 4 |
|  | C1QC | 0 | 2.566998 | 0.902 | 0.162 | 0 | 4 |
|  | MRC1 | 0 | 2.124019 | 0.792 | 0.108 | 0 | 4 |
|  | SLC40A1 | 0 | 2.073691 | 0.738 | 0.135 | 0 | 4 |
|  | SLCO2B1 | 0 | 1.852182 | 0.732 | 0.087 | 0 | 4 |
|  | MSR1 | 0 | 1.788173 | 0.819 | 0.166 | 0 | 4 |
|  | SLC1A3 | 0 | 1.596469 | 0.725 | 0.114 | 0 | 4 |
|  | FPR3 | 0 | 1.498681 | 0.637 | 0.086 | 0 | 4 |
|  | CD163L1 | 0 | 1.456826 | 0.911 | 0.175 | 0 | 4 |
|  | PROM1 | 0 | 1.600667 | 0.818 | 0.121 | 0 | 5 |
|  | FGFBP2 | 1.74E-292 | 2.371896 | 0.867 | 0.225 | 5.74E-288 | 5 |
|  | CX3CR1 | 8.56E-252 | 2.093814 | 0.869 | 0.259 | 2.83E-247 | 5 |
|  | GZMB | 5.17E-245 | 2.320002 | 0.969 | 0.468 | 1.71E-240 | 5 |
|  | NKG7 | 4.83E-243 | 1.816551 | 1 | 0.616 | 1.60E-238 | 5 |
|  | GZMH | 2.81E-240 | 2.042441 | 0.965 | 0.406 | 9.28E-236 | 5 |
|  | GNLY | 2.31E-235 | 2.479203 | 0.943 | 0.427 | 7.63E-231 | 5 |
|  | PRF1 | 1.38E-221 | 1.841218 | 0.99 | 0.61 | 4.58E-217 | 5 |
|  | S1PR5 | 1.35E-208 | 1.524771 | 0.724 | 0.167 | 4.47E-204 | 5 |
|  | CTSW | 5.19E-206 | 1.681554 | 0.982 | 0.496 | 1.72E-201 | 5 |
|  | LEF1 | 0 | 2.17783 | 0.779 | 0.13 | 0 | 6 |
|  | MAL | 0 | 1.789472 | 0.569 | 0.039 | 0 | 6 |
|  | TCF7 | 2.02E-238 | 1.909293 | 0.853 | 0.221 | 6.69E-234 | 6 |
|  | LINC00402 | 4.76E-232 | 1.126186 | 0.336 | 0.021 | 1.58E-227 | 6 |
|  | CCR7 | 1.18E-174 | 2.170678 | 0.844 | 0.328 | 3.90E-170 | 6 |
|  | LDLRAP1 | 1.88E-164 | 1.764857 | 0.688 | 0.188 | 6.22E-160 | 6 |
|  | LINC00861 | 4.47E-164 | 1.518049 | 0.914 | 0.377 | 1.48E-159 | 6 |
|  | LEF1-AS1 | 1.69E-163 | 0.618686 | 0.331 | 0.034 | 5.58E-159 | 6 |
|  | TRAC | 2.01E-161 | 1.490161 | 0.988 | 0.587 | 6.64E-157 | 6 |
|  | LDHB | 4.85E-160 | 1.382563 | 0.972 | 0.71 | 1.60E-155 | 6 |
|  | FLT3 | 0 | 1.96077 | 0.872 | 0.088 | 0 | 7 |
|  | LGALS2 | 0 | 1.433215 | 0.852 | 0.129 | 0 | 7 |
|  | CYP2S1 | 0 | 1.342402 | 0.583 | 0.041 | 0 | 7 |
|  | RP11-44K6.4 | 0 | 1.220404 | 0.443 | 0.021 | 0 | 7 |
|  | WFDC21P | 0 | 1.027927 | 0.557 | 0.03 | 0 | 7 |
|  | CTD-2319I12.2 | 0 | 0.655919 | 0.552 | 0.028 | 0 | 7 |
|  | RP11-146D12.2 | 0 | 0.382659 | 0.346 | 0.009 | 0 | 7 |
|  | CLIC2 | 9.09E-304 | 1.530697 | 0.716 | 0.091 | 3.01E-299 | 7 |
|  | IDO2 | 2.77E-287 | 0.845287 | 0.318 | 0.01 | 9.16E-283 | 7 |
|  | RP11-44K6.2 | 4.10E-285 | 0.714773 | 0.292 | 0.008 | 1.36E-280 | 7 |
|  | FCN1 | 0 | 2.704962 | 0.988 | 0.225 | 0 | 8 |
|  | S100A8 | 0 | 2.632133 | 0.971 | 0.146 | 0 | 8 |
|  | VCAN-AS1 | 0 | 2.525987 | 0.925 | 0.117 | 0 | 8 |
|  | S100A12 | 0 | 1.751977 | 0.611 | 0.028 | 0 | 8 |
|  | S100A9 | 5.41E-301 | 2.753504 | 0.983 | 0.232 | 1.79E-296 | 8 |
|  | VCAN | 2.26E-281 | 3.191576 | 0.988 | 0.295 | 7.48E-277 | 8 |
|  | CSF3R | 4.01E-256 | 2.821828 | 0.977 | 0.301 | 1.33E-251 | 8 |
|  | NFE2 | 1.69E-242 | 1.543072 | 0.429 | 0.032 | 5.59E-238 | 8 |
|  | TNFAIP2 | 3.75E-239 | 2.613963 | 0.916 | 0.249 | 1.24E-234 | 8 |
|  | LINC00937 | 2.06E-224 | 2.119204 | 0.625 | 0.092 | 6.82E-220 | 8 |
|  | PROM1 | 0 | 1.566241 | 0.902 | 0.132 | 0 | 9 |
|  | FGFBP2 | 7.79E-242 | 2.34739 | 0.935 | 0.237 | 2.58E-237 | 9 |
|  | KIR2DL1 | 2.25E-203 | 1.234461 | 0.61 | 0.087 | 7.43E-199 | 9 |
|  | S1PR5 | 1.47E-200 | 1.782911 | 0.81 | 0.176 | 4.86E-196 | 9 |
|  | SH2D1B | 4.47E-198 | 1.924286 | 0.86 | 0.209 | 1.48E-193 | 9 |
|  | FCGR3B | 1.37E-193 | 0.741829 | 0.914 | 0.234 | 4.54E-189 | 9 |
|  | LINC00299 | 1.62E-183 | 1.430807 | 0.607 | 0.097 | 5.37E-179 | 9 |
|  | GZMB | 6.21E-183 | 2.259907 | 0.991 | 0.478 | 2.05E-178 | 9 |
|  | KLRF1 | 1.08E-177 | 1.926092 | 0.875 | 0.255 | 3.59E-173 | 9 |
|  | KIR2DL3 | 5.70E-174 | 0.99385 | 0.64 | 0.109 | 1.88E-169 | 9 |
|  | IGHGP | 0 | 4.25734 | 0.928 | 0.164 | 0 | 10 |
|  | MZB1 | 0 | 3.729279 | 0.994 | 0.119 | 0 | 10 |
|  | ENAM | 0 | 3.375817 | 0.972 | 0.169 | 0 | 10 |
|  | DERL3 | 0 | 3.109659 | 0.991 | 0.127 | 0 | 10 |
|  | ITM2C | 0 | 3.057141 | 0.966 | 0.183 | 0 | 10 |
|  | IGHJ6 | 0 | 3.044292 | 0.966 | 0.14 | 0 | 10 |
|  | IGLC1 | 0 | 3.02396 | 0.972 | 0.187 | 0 | 10 |
|  | PRDX4 | 0 | 2.974723 | 0.981 | 0.191 | 0 | 10 |
|  | TXNDC5 | 0 | 2.814151 | 0.975 | 0.127 | 0 | 10 |
|  | IGHJ5 | 0 | 2.760488 | 0.906 | 0.125 | 0 | 10 |
|  | MARCO | 0 | 2.551666 | 0.884 | 0.076 | 0 | 11 |
|  | C5AR2 | 0 | 2.361576 | 0.816 | 0.067 | 0 | 11 |
|  | LYVE1 | 0 | 2.186426 | 0.679 | 0.035 | 0 | 11 |
|  | RNASE1 | 0 | 2.105135 | 0.72 | 0.069 | 0 | 11 |
|  | MLXIPL | 0 | 1.995945 | 0.655 | 0.022 | 0 | 11 |
|  | TMEM52B | 0 | 1.956467 | 0.805 | 0.081 | 0 | 11 |
|  | IL10 | 0 | 1.896343 | 0.642 | 0.046 | 0 | 11 |
|  | SEMA6B | 0 | 1.789238 | 0.693 | 0.037 | 0 | 11 |
|  | LINC01094 | 0 | 1.278122 | 0.468 | 0.022 | 0 | 11 |
|  | RNASE2 | 0 | 1.166913 | 0.539 | 0.031 | 0 | 11 |
|  | HBEGF | 6.40E-148 | 1.926717 | 0.833 | 0.215 | 2.12E-143 | 12 |
|  | C5AR1 | 1.26E-142 | 1.736129 | 0.833 | 0.217 | 4.15E-138 | 12 |
|  | PLAUR | 1.53E-142 | 1.970974 | 0.951 | 0.334 | 5.08E-138 | 12 |
|  | TREM1 | 2.98E-129 | 1.461248 | 0.715 | 0.161 | 9.87E-125 | 12 |
|  | RN7SL368P | 1.66E-120 | 1.3285 | 0.559 | 0.101 | 5.48E-116 | 12 |
|  | AIF1 | 2.46E-116 | 1.558438 | 0.97 | 0.396 | 8.15E-112 | 12 |
|  | NAMPT | 4.06E-113 | 1.621593 | 0.989 | 0.609 | 1.34E-108 | 12 |
|  | FCN1 | 3.24E-111 | 1.513175 | 0.825 | 0.241 | 1.07E-106 | 12 |
|  | LILRB3 | 3.73E-110 | 1.295548 | 0.837 | 0.249 | 1.23E-105 | 12 |
|  | IFI30 | 1.08E-107 | 1.587106 | 0.996 | 0.657 | 3.57E-103 | 12 |
|  | TCL1A | 0 | 3.339107 | 0.85 | 0.096 | 0 | 13 |
|  | IGHD | 0 | 3.127196 | 0.912 | 0.091 | 0 | 13 |
|  | FCRL1 | 0 | 2.708675 | 0.965 | 0.121 | 0 | 13 |
|  | RP11-164H13.1 | 0 | 2.635075 | 0.827 | 0.038 | 0 | 13 |
|  | FCER2 | 0 | 2.615473 | 0.812 | 0.065 | 0 | 13 |
|  | LINC00926 | 0 | 2.58742 | 0.938 | 0.121 | 0 | 13 |
|  | FAM129C | 0 | 2.133517 | 0.842 | 0.079 | 0 | 13 |
|  | PAX5 | 4.72E-303 | 2.005887 | 0.758 | 0.076 | 1.56E-298 | 13 |
|  | VPREB3 | 9.36E-297 | 1.760452 | 0.723 | 0.069 | 3.10E-292 | 13 |
|  | COL19A1 | 2.50E-266 | 1.965018 | 0.592 | 0.049 | 8.27E-262 | 13 |
|  | CTLA4 | 1.39E-179 | 2.029894 | 0.673 | 0.091 | 4.60E-175 | 14 |
|  | CXCL13 | 3.41E-143 | 1.793361 | 0.548 | 0.071 | 1.13E-138 | 14 |
|  | HCG4P7 | 1.42E-97 | 0.710513 | 0.963 | 0.512 | 4.69E-93 | 14 |
|  | ETV7 | 5.55E-93 | 1.096216 | 0.336 | 0.039 | 1.84E-88 | 14 |
|  | ICOS | 2.09E-92 | 1.675733 | 0.76 | 0.222 | 6.91E-88 | 14 |
|  | SIRPG | 3.04E-91 | 1.513214 | 0.737 | 0.202 | 1.01E-86 | 14 |
|  | PDCD1 | 2.78E-90 | 1.609656 | 0.59 | 0.131 | 9.18E-86 | 14 |
|  | HLA-K | 5.89E-87 | 0.857324 | 0.991 | 0.728 | 1.95E-82 | 14 |
|  | ASB2 | 2.46E-86 | 1.327876 | 0.475 | 0.085 | 8.14E-82 | 14 |
|  | TIGIT | 2.46E-85 | 1.63728 | 0.802 | 0.272 | 8.14E-81 | 14 |
|  | AC104809.4 | 0 | 1.455003 | 0.583 | 0.017 | 0 | 15 |
|  | RP11-221J22.2 | 1.03E-287 | 0.713933 | 0.342 | 0.007 | 3.40E-283 | 15 |
|  | RP11-1008C21.1 | 1.59E-269 | 0.904871 | 0.337 | 0.008 | 5.27E-265 | 15 |
|  | CDKN1C | 1.85E-235 | 0.7486 | 0.437 | 0.021 | 6.13E-231 | 15 |
|  | GPBAR1 | 2.99E-218 | 1.791842 | 0.613 | 0.053 | 9.89E-214 | 15 |
|  | C10orf105 | 9.15E-211 | 0.742673 | 0.407 | 0.021 | 3.03E-206 | 15 |
|  | RP11-362F19.1 | 3.83E-202 | 1.826074 | 0.668 | 0.071 | 1.27E-197 | 15 |
|  | RP11-57H14.2 | 1.15E-201 | 0.313383 | 0.598 | 0.053 | 3.81E-197 | 15 |
|  | AC008984.2 | 9.31E-197 | 0.874722 | 0.623 | 0.06 | 3.08E-192 | 15 |
|  | TCF7L2 | 1.15E-179 | 1.892261 | 0.859 | 0.151 | 3.81E-175 | 15 |
|  | APOA2 | 5.84E-127 | 1.41047 | 0.923 | 0.18 | 1.93E-122 | 16 |
|  | APOA1-AS | 1.56E-117 | 1.097485 | 0.762 | 0.124 | 5.15E-113 | 16 |
|  | APOC3 | 4.77E-114 | 0.875336 | 0.587 | 0.07 | 1.58E-109 | 16 |
|  | TTR | 3.00E-112 | 1.230801 | 0.762 | 0.13 | 9.94E-108 | 16 |
|  | FGB | 8.89E-112 | 0.97666 | 0.573 | 0.069 | 2.94E-107 | 16 |
|  | ALB | 1.04E-105 | 1.950569 | 0.867 | 0.199 | 3.44E-101 | 16 |
|  | APOA1 | 3.79E-104 | 1.551846 | 0.804 | 0.162 | 1.25E-99 | 16 |
|  | CYP3A4 | 1.54E-102 | 1.171863 | 0.643 | 0.1 | 5.09E-98 | 16 |
|  | APOC4-APOC2 | 3.47E-102 | 0.651048 | 0.657 | 0.1 | 1.15E-97 | 16 |
|  | CTB-96E2.2 | 6.78E-102 | 0.750545 | 0.601 | 0.084 | 2.24E-97 | 16 |
|  | SULT2A1 | 0 | 3.012688 | 0.905 | 0.061 | 0 | 17 |
|  | FGB | 0 | 3.006217 | 0.96 | 0.064 | 0 | 17 |
|  | FGG | 0 | 2.944737 | 0.913 | 0.057 | 0 | 17 |
|  | APOC3 | 0 | 2.931403 | 1 | 0.063 | 0 | 17 |
|  | HRG | 0 | 2.811051 | 0.913 | 0.061 | 0 | 17 |
|  | CYP2C9 | 0 | 2.725477 | 0.873 | 0.054 | 0 | 17 |
|  | AGXT | 0 | 2.660169 | 0.857 | 0.04 | 0 | 17 |
|  | FGA | 0 | 2.618087 | 0.81 | 0.044 | 0 | 17 |
|  | HPX | 0 | 2.563562 | 0.833 | 0.044 | 0 | 17 |
|  | CPS1 | 0 | 2.559722 | 0.881 | 0.05 | 0 | 17 |
|  | GNG11 | 0 | 2.615147 | 0.779 | 0.031 | 0 | 18 |
|  | SEPT5 | 0 | 2.582374 | 0.735 | 0.013 | 0 | 18 |
|  | PF4 | 0 | 2.537601 | 0.673 | 0.019 | 0 | 18 |
|  | GP1BB | 0 | 2.523866 | 0.726 | 0.011 | 0 | 18 |
|  | CTB-113P19.1 | 2.30E-287 | 0.749211 | 0.487 | 0.012 | 7.61E-283 | 18 |
|  | GP9 | 6.14E-245 | 1.646955 | 0.301 | 0.004 | 2.03E-240 | 18 |
|  | AP001189.4 | 1.60E-238 | 1.082415 | 0.381 | 0.008 | 5.28E-234 | 18 |
|  | PPBP | 1.24E-209 | 3.317733 | 0.708 | 0.048 | 4.09E-205 | 18 |
|  | TUBB1 | 1.38E-196 | 2.776848 | 0.637 | 0.04 | 4.56E-192 | 18 |
|  | MYL9 | 1.85E-182 | 1.43626 | 0.496 | 0.024 | 6.13E-178 | 18 |
|  | IL1RL1 | 0 | 3.835688 | 1 | 0.036 | 0 | 19 |
|  | HDC | 0 | 3.825179 | 1 | 0.03 | 0 | 19 |
|  | TPSD1 | 0 | 3.781313 | 1 | 0.032 | 0 | 19 |
|  | MS4A2 | 0 | 3.582534 | 1 | 0.023 | 0 | 19 |
|  | HPGDS | 0 | 3.241975 | 0.958 | 0.024 | 0 | 19 |
|  | RP11-80A15.1 | 0 | 2.907318 | 0.944 | 0.013 | 0 | 19 |
|  | GATA2 | 0 | 2.798806 | 0.93 | 0.012 | 0 | 19 |
|  | ADCYAP1 | 0 | 2.570934 | 0.62 | 0.009 | 0 | 19 |
|  | RP11-354E11.2 | 0 | 2.34854 | 0.69 | 0.007 | 0 | 19 |
|  | ENPP3 | 0 | 2.26028 | 0.746 | 0.014 | 0 | 19 |
|  | XIST | 5.58E-92 | 2.488287 | 0.906 | 0.059 | 1.84E-87 | 20 |
|  | XIST-intron | 9.13E-79 | 0.437633 | 0.375 | 0.011 | 3.02E-74 | 20 |
|  | TSIX | 2.10E-77 | 2.059625 | 0.812 | 0.055 | 6.95E-73 | 20 |
|  | HPX | 7.49E-56 | 0.426741 | 0.719 | 0.055 | 2.48E-51 | 20 |
|  | C4BPA | 6.40E-54 | 0.962633 | 0.594 | 0.04 | 2.12E-49 | 20 |
|  | GC | 7.67E-54 | 0.36557 | 0.844 | 0.082 | 2.54E-49 | 20 |
|  | SERPINC1 | 1.05E-52 | 0.361283 | 0.844 | 0.084 | 3.46E-48 | 20 |
|  | CES1 | 3.64E-49 | 0.689106 | 0.625 | 0.048 | 1.20E-44 | 20 |
|  | CYP3A4 | 5.06E-41 | 0.493107 | 0.844 | 0.108 | 1.67E-36 | 20 |
|  | ARG1 | 3.14E-39 | 0.41667 | 0.719 | 0.079 | 1.04E-34 | 20 |
|  | CD8A | 2.18E-289 | 2.065945 | 0.882 | 0.365 | 7.20E-285 | CD8Tex cell |
|  | CTD-2313F11.1 | 9.13E-288 | 1.815268 | 0.872 | 0.339 | 3.02E-283 | CD8Tex cell |
|  | GZMK | 1.38E-279 | 1.894165 | 0.881 | 0.371 | 4.56E-275 | CD8Tex cell |
|  | CD3D | 4.78E-264 | 1.393069 | 0.957 | 0.385 | 1.58E-259 | CD8Tex cell |
|  | ANAPC1P1 | 1.44E-257 | 0.560559 | 0.537 | 0.09 | 4.77E-253 | CD8Tex cell |
|  | CD8B | 1.13E-245 | 1.649306 | 0.708 | 0.204 | 3.72E-241 | CD8Tex cell |
|  | TRGJ1 | 1.46E-234 | 0.29905 | 0.583 | 0.118 | 4.82E-230 | CD8Tex cell |
|  | CCL5 | 9.23E-230 | 1.440265 | 0.997 | 0.663 | 3.05E-225 | CD8Tex cell |
|  | CD3E | 2.99E-213 | 1.158761 | 0.951 | 0.41 | 9.88E-209 | CD8Tex cell |
|  | CD3G | 2.38E-211 | 1.333443 | 0.918 | 0.423 | 7.86E-207 | CD8Tex cell |
|  | KLRD1 | 0 | 2.725196 | 0.977 | 0.444 | 0 | NK cell |
|  | GNLY | 0 | 2.711386 | 0.786 | 0.371 | 0 | NK cell |
|  | GZMB | 0 | 2.550074 | 0.851 | 0.404 | 0 | NK cell |
|  | KLRF1 | 0 | 2.48703 | 0.732 | 0.157 | 0 | NK cell |
|  | FGFBP2 | 0 | 2.355718 | 0.632 | 0.167 | 0 | NK cell |
|  | NKG7 | 0 | 2.337835 | 0.996 | 0.542 | 0 | NK cell |
|  | PRF1 | 0 | 2.281943 | 0.98 | 0.539 | 0 | NK cell |
|  | TRDC | 0 | 2.227431 | 0.753 | 0.211 | 0 | NK cell |
|  | GZMH | 0 | 2.185392 | 0.83 | 0.335 | 0 | NK cell |
|  | CTSW | 0 | 2.096492 | 0.949 | 0.411 | 0 | NK cell |
|  | IL7R | 0 | 2.018091 | 0.941 | 0.535 | 0 | CD4Tconv cell |
|  | TRAC | 0 | 1.728468 | 0.987 | 0.533 | 0 | CD4Tconv cell |
|  | INPP4B | 0 | 1.670842 | 0.807 | 0.279 | 0 | CD4Tconv cell |
|  | LEF1 | 0 | 1.644684 | 0.514 | 0.097 | 0 | CD4Tconv cell |
|  | CD28 | 0 | 1.378769 | 0.684 | 0.163 | 0 | CD4Tconv cell |
|  | CD3D | 0 | 1.308403 | 0.905 | 0.352 | 0 | CD4Tconv cell |
|  | TNFRSF25 | 0 | 1.279365 | 0.5 | 0.081 | 0 | CD4Tconv cell |
|  | CD3E | 0 | 1.272826 | 0.94 | 0.37 | 0 | CD4Tconv cell |
|  | RNU1-125P | 0 | 0.753126 | 0.966 | 0.371 | 0 | CD4Tconv cell |
|  | IL32 | 1.65E-304 | 1.266878 | 0.98 | 0.546 | 5.45E-300 | CD4Tconv cell |
|  | MS4A1 | 0 | 3.55933 | 0.994 | 0.339 | 0 | B cell |
|  | BANK1 | 0 | 3.192819 | 0.977 | 0.18 | 0 | B cell |
|  | CD79A | 0 | 2.976075 | 0.995 | 0.269 | 0 | B cell |
|  | LINC00926 | 0 | 2.669141 | 0.869 | 0.058 | 0 | B cell |
|  | CD22 | 0 | 2.546388 | 0.864 | 0.093 | 0 | B cell |
|  | FCRL1 | 0 | 2.518584 | 0.889 | 0.056 | 0 | B cell |
|  | IGHM | 0 | 2.428338 | 0.888 | 0.36 | 0 | B cell |
|  | IGHD | 0 | 2.406287 | 0.561 | 0.065 | 0 | B cell |
|  | CD79B | 0 | 2.405449 | 0.93 | 0.273 | 0 | B cell |
|  | FCRLA | 0 | 2.393302 | 0.705 | 0.067 | 0 | B cell |
|  | VCAN | 0 | 2.827615 | 0.698 | 0.192 | 0 | Monocyte/Macrophage |
|  | SLC11A1 | 0 | 2.77092 | 0.777 | 0.14 | 0 | Monocyte/Macrophage |
|  | RP11-1143G9.4 | 0 | 2.728611 | 0.97 | 0.488 | 0 | Monocyte/Macrophage |
|  | LYZ | 0 | 2.718158 | 0.972 | 0.534 | 0 | Monocyte/Macrophage |
|  | FCN1 | 0 | 2.621604 | 0.688 | 0.104 | 0 | Monocyte/Macrophage |
|  | CSF3R | 0 | 2.508623 | 0.799 | 0.162 | 0 | Monocyte/Macrophage |
|  | AIF1 | 0 | 2.4832 | 0.933 | 0.226 | 0 | Monocyte/Macrophage |
|  | S100A9 | 0 | 2.454258 | 0.696 | 0.11 | 0 | Monocyte/Macrophage |
|  | LILRB2 | 0 | 2.434364 | 0.848 | 0.143 | 0 | Monocyte/Macrophage |
|  | CST3 | 0 | 2.373407 | 0.988 | 0.462 | 0 | Monocyte/Macrophage |
|  | FLT3 | 0 | 1.96077 | 0.872 | 0.088 | 0 | DC cell |
|  | LGALS2 | 0 | 1.433215 | 0.852 | 0.129 | 0 | DC cell |
|  | CYP2S1 | 0 | 1.342402 | 0.583 | 0.041 | 0 | DC cell |
|  | RP11-44K6.4 | 0 | 1.220404 | 0.443 | 0.021 | 0 | DC cell |
|  | WFDC21P | 0 | 1.027927 | 0.557 | 0.03 | 0 | DC cell |
|  | CTD-2319I12.2 | 0 | 0.655919 | 0.552 | 0.028 | 0 | DC cell |
|  | RP11-146D12.2 | 0 | 0.382659 | 0.346 | 0.009 | 0 | DC cell |
|  | CLIC2 | 9.09E-304 | 1.530697 | 0.716 | 0.091 | 3.01E-299 | DC cell |
|  | IDO2 | 2.77E-287 | 0.845287 | 0.318 | 0.01 | 9.16E-283 | DC cell |
|  | RP11-44K6.2 | 4.10E-285 | 0.714773 | 0.292 | 0.008 | 1.36E-280 | DC cell |
|  | IGHGP | 0 | 4.25734 | 0.928 | 0.164 | 0 | Plasma cell |
|  | MZB1 | 0 | 3.729279 | 0.994 | 0.119 | 0 | Plasma cell |
|  | ENAM | 0 | 3.375817 | 0.972 | 0.169 | 0 | Plasma cell |
|  | DERL3 | 0 | 3.109659 | 0.991 | 0.127 | 0 | Plasma cell |
|  | ITM2C | 0 | 3.057141 | 0.966 | 0.183 | 0 | Plasma cell |
|  | IGHJ6 | 0 | 3.044292 | 0.966 | 0.14 | 0 | Plasma cell |
|  | IGLC1 | 0 | 3.02396 | 0.972 | 0.187 | 0 | Plasma cell |
|  | PRDX4 | 0 | 2.974723 | 0.981 | 0.191 | 0 | Plasma cell |
|  | TXNDC5 | 0 | 2.814151 | 0.975 | 0.127 | 0 | Plasma cell |
|  | IGHJ5 | 0 | 2.760488 | 0.906 | 0.125 | 0 | Plasma cell |
|  | IL1RL1 | 0 | 3.835688 | 1 | 0.036 | 0 | Mast cell |
|  | HDC | 0 | 3.825179 | 1 | 0.03 | 0 | Mast cell |
|  | TPSD1 | 0 | 3.781313 | 1 | 0.032 | 0 | Mast cell |
|  | MS4A2 | 0 | 3.582534 | 1 | 0.023 | 0 | Mast cell |
|  | HPGDS | 0 | 3.241975 | 0.958 | 0.024 | 0 | Mast cell |
|  | RP11-80A15.1 | 0 | 2.907318 | 0.944 | 0.013 | 0 | Mast cell |
|  | GATA2 | 0 | 2.798806 | 0.93 | 0.012 | 0 | Mast cell |
|  | ADCYAP1 | 0 | 2.570934 | 0.62 | 0.009 | 0 | Mast cell |
|  | RP11-354E11.2 | 0 | 2.34854 | 0.69 | 0.007 | 0 | Mast cell |
|  | ENPP3 | 0 | 2.26028 | 0.746 | 0.014 | 0 | Mast cell |

**Supplementary Table 3**

Marker genes of different cell types in the two cohorts.

| **Cohorts** | **Cell types** | **Marker genes** |
| --- | --- | --- |
| GSE125449 | Malignant cell | FTCD, CHD1, BEX2, SOX9 |
| CD8 Tex cell | CD2, CD3E, CD3D, CD3G |
| B and plasma cell | CD79A, SLAMF7, BLNK, FCRL5 |
| Endothelial cell | PECAM1, VWF, ENG, CDH5 |
| Fibroblast | COL1A2, FAP, DCN, COL3A1, COL6A1 |
| Monocyte/Macrophage | CD14, CD163, CD68, CSF1R |
| Hepatic progenitor cell | EPCAM, KRT19, PROM1, ALDH1A1, CD24 |
| GSE140228 | T cell | CD2, CD3E, CD3D, CD3G |
| CD4 Tconv cell | CD4 |
| CD8 Tex cell | CD8A, CD8B, PDCD1, LAG3 |
| NK cell | KLRD1 |
| B and plasma cell | CD79A, SLAMF7, BLNK, FCRL5, IGKC |
| Monocyte/Macrophage | CD14, CD163, CD68, CSF1R |
| Dendritic cell | FCGR3A, LAMP3, CD86, CD1C |
| Mast cell | CPA3 |

**Supplementary Table 4**

Marker genes of CD8 Tex cells

| **Marker genes of CD8 Tex cells** |
| --- |
| CD3D |
| CCL5 |
| CD3E |
| CD3G |
| TRAC |
| IL32 |
| TRBC2 |
| GZMA |
| CD2 |
| CD96 |
| FYN |
| CD69 |
| TRAT1 |
| CST7 |
| IL7R |
| LCK |
| NKG7 |
| SPOCK2 |
| ITM2A |
| CXCR4 |
| DUSP2 |
| PDCD4 |
| DNAJB1 |
| SRSF7 |
| LEPROTL1 |
| SARAF |
| RNF19A |
| TNFAIP3 |
| RORA |
| SYNE2 |
| CNOT6L |
| SLC38A1 |
| PPP2R5C |
| TUBA4A |
| EMB |
| FAM46C |
| PTPRC |
| LAT |
| PIK3R1 |
| CD7 |
| ETS1 |
| ARHGDIB |
| EML4 |
| CDC42SE2 |
| PTPN7 |
| HSPA8 |
| APOBEC3G |
| RUNX3 |
| CLEC2D |
| RARRES3 |
| WIPF1 |
| ANXA1 |
| HCST |
| RPS3 |
| ZFP36L2 |
| LCP1 |
| CALM1 |
| ACAP1 |
| CLEC2B |
| EVL |
| ID2 |
| IL2RG |
| RHOH |
| G3BP2 |
| MYL12B |
| MYL12A |
| BUB3 |
| CYTIP |
| CD44 |
| ELF1 |
| CORO1A |
| ARL4C |
| RPS27 |
| YWHAZ |
| DUSP4 |
| HNRNPC |
| CLK1 |
| GNG2 |
| CREM |
| YPEL5 |
| FAM177A1 |
| HNRNPA1 |
| RGS1 |
| RPS27A |
| IFNG |
| STK4 |
| EZR |
| CNN2 |
| BTG1 |
| SRGN |
| HLA-F |
| SAMSN1 |
| PPP1R2 |
| C9orf142 |
| PDE4B |
| RPL23A |
| KLRB1 |
| GIMAP7 |
| TOB1 |
| LBH |
| DNAJB6 |
| NOP58 |
| ZNF331 |
| STK17B |
| ALOX5AP |
| RHOF |
| LDHB |
| STK17A |
| RAC2 |
| GYPC |
| GPR65 |
| AAK1 |
| CCND2 |
| RPL10A |
| CCND3 |
| NR4A2 |
| SRSF2 |
| FYB |
| C9orf78 |
| ABRACL |
| DDX24 |
| RPS15A |
| DDIT4 |
| ISG20 |
| TERF2IP |
| RGCC |
| RPL36AL |
| DNAJA1 |
| SRSF3 |
| CAPZA1 |
| SH3KBP1 |
| ANXA6 |
| C12orf75 |
| HMGB2 |
| TNFSF14 |
| ZC3HAV1 |
| TAP1 |
| TBC1D10C |
| RPS26 |
| TANK |
| HSPE1 |
| ANP32E |
| ARF6 |
| CHORDC1 |
| CACYBP |
| CD48 |
| PA2G4 |

**Supplementary Table 5**

Correlations between CD8 Tex-related mRNAs and candidate lncRNAs

| **CD8 Tex-related mRNA** | **lncRNAs** | **p value** | **Coefficient** |
| --- | --- | --- | --- |
| CD3D | MAPKAPK5-AS1 | 4.70E-10 | 0.316113 |
| CD3D | PDCD4-AS1 | 1.65E-12 | 0.355724 |
| CD3E | HAND2-AS1 | 2.16E-13 | 0.368728 |
| CD3E | PDCD4-AS1 | 4.23E-13 | 0.364499 |
| CD3G | HAND2-AS1 | 2.14E-14 | 0.382832 |
| CD3G | PDCD4-AS1 | 1.45E-12 | 0.356604 |
| IL32 | KLF3-AS1 | 1.25E-14 | -0.38599 |
| IL32 | MCM3AP-AS1 | 8.04E-11 | -0.32912 |
| CD2 | HAND2-AS1 | 1.23E-11 | 0.342289 |
| CD2 | PDCD4-AS1 | 5.85E-12 | 0.34735 |
| CD96 | HAND2-AS1 | 1.32E-16 | 0.411659 |
| CD96 | PDCD4-AS1 | 9.54E-12 | 0.344037 |
| FYN | HAND2-AS1 | 7.41E-13 | 0.360923 |
| FYN | OR7E47P | 2.32E-09 | 0.303812 |
| CD69 | GSN-AS1 | 2.91E-09 | 0.302001 |
| CD69 | HAND2-AS1 | 5.97E-20 | 0.450585 |
| CD69 | MEG3 | 4.18E-10 | 0.317011 |
| CD69 | PDCD4-AS1 | 9.85E-10 | 0.310485 |
| TRAT1 | HAND2-AS1 | 2.17E-14 | 0.382743 |
| TRAT1 | PDCD4-AS1 | 1.55E-10 | 0.324379 |
| CST7 | PDCD4-AS1 | 5.76E-12 | 0.347455 |
| IL7R | GSN-AS1 | 2.63E-10 | 0.320449 |
| IL7R | HAND2-AS1 | 5.85E-31 | 0.551898 |
| IL7R | MEG3 | 9.17E-14 | 0.374035 |
| LCK | HAND2-AS1 | 1.29E-13 | 0.37194 |
| LCK | PDCD4-AS1 | 2.57E-13 | 0.367649 |
| SPOCK2 | HAND2-AS1 | 1.60E-14 | 0.384549 |
| SPOCK2 | PDCD4-AS1 | 4.18E-11 | 0.333788 |
| ITM2A | GSN-AS1 | 2.76E-09 | 0.30243 |
| ITM2A | HAND2-AS1 | 7.73E-24 | 0.490343 |
| CXCR4 | GSN-AS1 | 1.08E-11 | 0.343161 |
| CXCR4 | HAND2-AS1 | 1.38E-24 | 0.49744 |
| CXCR4 | LINC01140 | 3.80E-11 | 0.334463 |
| CXCR4 | MEG3 | 4.28E-13 | 0.364432 |
| CXCR4 | PDCD4-AS1 | 3.26E-09 | 0.301098 |
| DUSP2 | MAPKAPK5-AS1 | 3.02E-10 | 0.319433 |
| DUSP2 | MEG3 | 2.29E-10 | 0.321497 |
| DUSP2 | PDCD4-AS1 | 2.02E-11 | 0.338863 |
| DUSP2 | SNHG17 | 2.15E-09 | 0.304388 |
| PDCD4 | DLEU2 | 2.62E-09 | 0.302854 |
| PDCD4 | LINC00216 | 4.09E-10 | 0.31716 |
| PDCD4 | LINC00652 | 2.25E-10 | 0.321607 |
| PDCD4 | LINC01140 | 2.50E-15 | 0.395328 |
| PDCD4 | MCM3AP-AS1 | 4.72E-18 | 0.429112 |
| PDCD4 | MEG3 | 1.62E-09 | 0.306617 |
| PDCD4 | PDCD4-AS1 | 3.59E-24 | 0.493523 |
| DNAJB1 | SNHG17 | 3.23E-09 | 0.301179 |
| SRSF7 | DLEU2 | 9.13E-29 | 0.534244 |
| SRSF7 | GUSBP11 | 6.92E-17 | 0.415111 |
| SRSF7 | HLA-F-AS1 | 3.46E-14 | 0.379949 |
| SRSF7 | INE1 | 2.93E-10 | 0.319652 |
| SRSF7 | KLF3-AS1 | 1.97E-11 | 0.339047 |
| SRSF7 | LINC00115 | 2.71E-14 | 0.381412 |
| SRSF7 | LINC00216 | 3.12E-13 | 0.366429 |
| SRSF7 | LINC00652 | 7.67E-12 | 0.345519 |
| SRSF7 | LINC01140 | 1.40E-11 | 0.34143 |
| SRSF7 | MAPKAPK5-AS1 | 1.98E-13 | 0.369291 |
| SRSF7 | MCM3AP-AS1 | 2.49E-32 | 0.562424 |
| SRSF7 | SNHG17 | 2.14E-20 | 0.455421 |
| LEPROTL1 | HAND2-AS1 | 2.68E-10 | 0.320329 |
| LEPROTL1 | LINC01140 | 2.80E-15 | 0.394679 |
| RNF19A | GSN-AS1 | 9.93E-10 | 0.310423 |
| RNF19A | INE1 | 1.85E-15 | 0.397056 |
| RNF19A | KLF3-AS1 | 3.28E-10 | 0.318812 |
| RNF19A | LINC00216 | 1.27E-17 | 0.424018 |
| RNF19A | MCM3AP-AS1 | 5.74E-18 | 0.428117 |
| TNFAIP3 | GSN-AS1 | 5.59E-11 | 0.331718 |
| TNFAIP3 | LINC00216 | 8.60E-14 | 0.37443 |
| TNFAIP3 | LINC00652 | 1.51E-09 | 0.307147 |
| TNFAIP3 | LINC01140 | 3.31E-10 | 0.318744 |
| TNFAIP3 | MCM3AP-AS1 | 3.97E-13 | 0.3649 |
| RORA | KLF3-AS1 | 5.03E-11 | 0.332476 |
| RORA | MAPKAPK5-AS1 | 9.77E-26 | -0.50801 |
| RORA | OR7E47P | 7.17E-11 | 0.329936 |
| RORA | SNHG17 | 1.17E-14 | -0.38641 |
| SYNE2 | GSN-AS1 | 1.02E-18 | 0.436805 |
| SYNE2 | IDI2-AS1 | 6.58E-11 | 0.330559 |
| SYNE2 | INE1 | 2.25E-21 | 0.465754 |
| SYNE2 | KLF3-AS1 | 4.57E-17 | 0.417316 |
| SYNE2 | LINC00216 | 4.24E-27 | 0.520097 |
| SYNE2 | LINC00652 | 1.36E-13 | 0.371614 |
| SYNE2 | MCM3AP-AS1 | 3.20E-11 | 0.335657 |
| CNOT6L | GSN-AS1 | 2.18E-13 | 0.368677 |
| CNOT6L | INE1 | 1.03E-10 | 0.32733 |
| CNOT6L | KLF3-AS1 | 4.85E-18 | 0.428978 |
| CNOT6L | LINC00216 | 2.35E-17 | 0.420829 |
| CNOT6L | LINC00652 | 5.30E-11 | 0.332092 |
| CNOT6L | MCM3AP-AS1 | 2.37E-09 | 0.303643 |
| SLC38A1 | LINC01140 | 1.94E-15 | 0.396773 |
| SLC38A1 | MAPKAPK5-AS1 | 1.83E-13 | 0.369777 |
| SLC38A1 | MCM3AP-AS1 | 4.52E-12 | 0.349076 |
| PPP2R5C | KLF3-AS1 | 1.14E-09 | 0.309362 |
| EMB | GSN-AS1 | 2.11E-13 | 0.368883 |
| EMB | HAND2-AS1 | 1.38E-25 | 0.506667 |
| EMB | LINC01140 | 1.62E-11 | 0.340396 |
| EMB | MEG3 | 5.28E-12 | 0.348033 |
| EMB | PDCD4-AS1 | 3.17E-11 | 0.335722 |
| PTPRC | GSN-AS1 | 1.01E-15 | 0.400444 |
| PTPRC | HAND2-AS1 | 1.05E-15 | 0.400254 |
| PTPRC | LINC00216 | 2.53E-14 | 0.381838 |
| PTPRC | LINC01140 | 4.25E-13 | 0.364473 |
| PTPRC | PDCD4-AS1 | 9.99E-11 | 0.327556 |
| LAT | ASMTL-AS1 | 1.37E-17 | 0.423642 |
| LAT | DLEU2 | 8.93E-15 | 0.387981 |
| LAT | GSN-AS1 | 1.20E-12 | 0.357802 |
| LAT | GUSBP11 | 2.28E-19 | 0.44417 |
| LAT | HLA-F-AS1 | 8.62E-12 | 0.344721 |
| LAT | INE1 | 1.96E-13 | 0.369328 |
| LAT | LINC00115 | 1.48E-14 | 0.385026 |
| LAT | LINC00216 | 5.54E-11 | 0.331786 |
| LAT | MCM3AP-AS1 | 1.71E-19 | 0.445563 |
| LAT | MEG3 | 3.26E-12 | 0.351264 |
| PIK3R1 | KLF3-AS1 | 8.38E-14 | 0.37459 |
| PIK3R1 | LINC00216 | 2.89E-12 | 0.35206 |
| PIK3R1 | MAPKAPK5-AS1 | 1.01E-17 | -0.42522 |
| PIK3R1 | SNHG17 | 4.99E-13 | -0.36346 |
| PIK3R1 | SNX29P2 | 1.96E-09 | 0.305134 |
| CD7 | GUSBP11 | 2.42E-11 | 0.337615 |
| CD7 | MAPKAPK5-AS1 | 1.30E-10 | 0.325641 |
| CD7 | PDCD4-AS1 | 1.73E-12 | 0.355431 |
| ETS1 | GSN-AS1 | 9.02E-27 | 0.517232 |
| ETS1 | HAND2-AS1 | 2.48E-39 | 0.610935 |
| ETS1 | LINC00216 | 5.27E-15 | 0.391046 |
| ETS1 | LINC01140 | 2.66E-09 | 0.302718 |
| ETS1 | SNX29P2 | 3.98E-10 | 0.317371 |
| ARHGDIB | GSN-AS1 | 1.10E-09 | 0.309614 |
| ARHGDIB | HAND2-AS1 | 1.96E-23 | 0.486441 |
| ARHGDIB | LINC01140 | 2.74E-11 | 0.336742 |
| ARHGDIB | MEG3 | 2.82E-11 | 0.336542 |
| ARHGDIB | PDCD4-AS1 | 4.91E-11 | 0.332639 |
| EML4 | DLEU2 | 3.10E-18 | 0.43124 |
| EML4 | HLA-F-AS1 | 1.54E-11 | 0.340769 |
| EML4 | KLF3-AS1 | 4.17E-21 | 0.462963 |
| EML4 | LINC00216 | 2.00E-15 | 0.396606 |
| EML4 | LINC00667 | 8.54E-16 | 0.401395 |
| EML4 | MCM3AP-AS1 | 1.14E-28 | 0.53345 |
| CDC42SE2 | DLEU2 | 1.70E-10 | 0.323676 |
| CDC42SE2 | LINC00216 | 4.68E-20 | 0.451736 |
| CDC42SE2 | LINC00652 | 4.63E-12 | 0.348912 |
| CDC42SE2 | LINC01140 | 5.47E-21 | 0.461717 |
| CDC42SE2 | MCM3AP-AS1 | 8.05E-20 | 0.449165 |
| PTPN7 | PDCD4-AS1 | 9.64E-14 | 0.373726 |
| HSPA8 | LINC01140 | 6.52E-10 | 0.313646 |
| APOBEC3G | HAND2-AS1 | 5.40E-10 | 0.315073 |
| APOBEC3G | PDCD4-AS1 | 1.17E-13 | 0.372525 |
| RUNX3 | GSN-AS1 | 2.51E-09 | 0.303175 |
| RUNX3 | HAND2-AS1 | 4.22E-18 | 0.429678 |
| RUNX3 | MEG3 | 2.87E-09 | 0.302126 |
| RUNX3 | PDCD4-AS1 | 1.25E-13 | 0.372149 |
| CLEC2D | DLEU2 | 1.14E-17 | 0.424591 |
| CLEC2D | GUSBP11 | 5.62E-15 | 0.390676 |
| CLEC2D | HLA-F-AS1 | 8.72E-10 | 0.311418 |
| CLEC2D | LINC01140 | 1.61E-10 | 0.324078 |
| CLEC2D | MCM3AP-AS1 | 4.82E-13 | 0.363672 |
| CLEC2D | MEG3 | 6.44E-12 | 0.3467 |
| CLEC2D | PDCD4-AS1 | 5.98E-15 | 0.390317 |
| CLEC2D | TCL6 | 8.79E-10 | 0.311356 |
| WIPF1 | GSN-AS1 | 8.56E-15 | 0.388229 |
| WIPF1 | HAND2-AS1 | 1.49E-19 | 0.446219 |
| WIPF1 | LINC01140 | 2.90E-16 | 0.407368 |
| WIPF1 | MEG3 | 2.52E-12 | 0.352954 |
| WIPF1 | PDCD4-AS1 | 1.35E-20 | 0.457555 |
| ANXA1 | GSN-AS1 | 1.28E-18 | 0.435674 |
| ANXA1 | HAND2-AS1 | 2.71E-33 | 0.5696 |
| ANXA1 | LINC01140 | 8.93E-12 | 0.344481 |
| HCST | KLF3-AS1 | 9.90E-11 | -0.32762 |
| HCST | MAPKAPK5-AS1 | 1.19E-10 | 0.32626 |
| HCST | PDCD4-AS1 | 1.48E-12 | 0.356459 |
| RPS3 | GUSBP11 | 5.22E-10 | 0.315321 |
| RPS3 | MAPKAPK5-AS1 | 2.10E-37 | 0.598382 |
| RPS3 | SNHG17 | 9.46E-41 | 0.619837 |
| RPS3 | SNX29P2 | 1.94E-12 | -0.35468 |
| ZFP36L2 | GSN-AS1 | 2.02E-09 | 0.3049 |
| ZFP36L2 | MCM3AP-AS1 | 5.99E-14 | 0.376639 |
| LCP1 | DGCR5 | 1.23E-10 | -0.32604 |
| LCP1 | PDCD4-AS1 | 1.18E-11 | 0.342581 |
| CALM1 | HAND2-AS1 | 8.38E-11 | 0.328825 |
| ACAP1 | HAND2-AS1 | 8.48E-10 | 0.311636 |
| ACAP1 | PDCD4-AS1 | 2.27E-14 | 0.382463 |
| CLEC2B | HAND2-AS1 | 1.53E-17 | 0.423078 |
| ID2 | PART1 | 3.49E-10 | -0.31836 |
| IL2RG | HAND2-AS1 | 1.31E-10 | 0.325569 |
| IL2RG | LINC01140 | 1.64E-09 | 0.306518 |
| IL2RG | PDCD4-AS1 | 1.64E-09 | 0.306516 |
| RHOH | HAND2-AS1 | 9.01E-14 | 0.374141 |
| RHOH | LINC01140 | 1.54E-09 | 0.30701 |
| RHOH | MEG3 | 9.56E-12 | 0.344018 |
| RHOH | PDCD4-AS1 | 1.76E-14 | 0.383999 |
| G3BP2 | GSN-AS1 | 1.73E-18 | 0.434183 |
| G3BP2 | INE1 | 2.20E-12 | 0.353854 |
| G3BP2 | KLF3-AS1 | 5.56E-12 | 0.347693 |
| G3BP2 | LINC00216 | 4.30E-24 | 0.492778 |
| G3BP2 | LINC00652 | 2.40E-11 | 0.337684 |
| G3BP2 | LINC01140 | 2.52E-11 | 0.337325 |
| G3BP2 | MCM3AP-AS1 | 3.07E-16 | 0.407049 |
| MYL12B | LINC00574 | 4.42E-11 | -0.33339 |
| MYL12A | LINC00574 | 3.11E-11 | -0.33586 |
| BUB3 | DLEU2 | 4.16E-23 | 0.48325 |
| BUB3 | GUSBP11 | 2.52E-10 | 0.320774 |
| BUB3 | HLA-F-AS1 | 9.51E-14 | 0.373814 |
| BUB3 | LINC00216 | 1.77E-10 | 0.323372 |
| BUB3 | LINC01140 | 2.93E-13 | 0.366821 |
| BUB3 | MAPKAPK5-AS1 | 1.64E-13 | 0.370439 |
| BUB3 | MCM3AP-AS1 | 2.50E-29 | 0.538877 |
| BUB3 | SNHG17 | 3.63E-09 | 0.300239 |
| CYTIP | HAND2-AS1 | 5.02E-17 | 0.416828 |
| CYTIP | MEG3 | 1.41E-12 | 0.356752 |
| CYTIP | PDCD4-AS1 | 1.26E-12 | 0.35751 |
| CD44 | GSN-AS1 | 1.07E-09 | 0.309821 |
| ELF1 | DLEU2 | 9.24E-18 | 0.425671 |
| ELF1 | GSN-AS1 | 4.01E-22 | 0.473439 |
| ELF1 | HAND2-AS1 | 5.25E-13 | 0.363133 |
| ELF1 | INE1 | 3.34E-20 | 0.453338 |
| ELF1 | KLF3-AS1 | 3.12E-23 | 0.484474 |
| ELF1 | LINC00216 | 2.14E-33 | 0.57035 |
| ELF1 | LINC00652 | 4.97E-10 | 0.315702 |
| ELF1 | LINC01140 | 1.95E-12 | 0.354652 |
| ELF1 | MCM3AP-AS1 | 4.50E-23 | 0.482921 |
| CORO1A | HAND2-AS1 | 1.92E-11 | 0.339233 |
| CORO1A | PDCD4-AS1 | 1.23E-14 | 0.386096 |
| ARL4C | HAND2-AS1 | 3.14E-17 | 0.419296 |
| ARL4C | LINC01140 | 1.30E-15 | 0.399037 |
| ARL4C | MEG3 | 1.30E-13 | 0.371881 |
| ARL4C | PDCD4-AS1 | 4.68E-11 | 0.332986 |
| ARL4C | SNHG17 | 6.22E-10 | 0.314001 |
| RPS27 | MAPKAPK5-AS1 | 4.95E-22 | 0.47251 |
| RPS27 | SNHG17 | 2.01E-26 | 0.514155 |
| YWHAZ | GUSBP11 | 1.30E-15 | 0.399045 |
| YWHAZ | LINC00574 | 3.21E-17 | -0.41918 |
| YWHAZ | LINC01140 | 2.35E-11 | 0.337813 |
| YWHAZ | MAPKAPK5-AS1 | 2.25E-15 | 0.39592 |
| YWHAZ | MCM3AP-AS1 | 4.06E-15 | 0.392547 |
| YWHAZ | SNHG17 | 1.09E-21 | 0.469014 |
| DUSP4 | GSN-AS1 | 3.40E-10 | 0.318541 |
| DUSP4 | HAND2-AS1 | 1.31E-20 | 0.457696 |
| DUSP4 | LINC01140 | 2.32E-14 | 0.382354 |
| HNRNPC | DLEU2 | 3.87E-27 | 0.520441 |
| HNRNPC | GUSBP11 | 3.29E-15 | 0.393755 |
| HNRNPC | HLA-F-AS1 | 7.87E-13 | 0.360543 |
| HNRNPC | KLF3-AS1 | 2.63E-09 | 0.302816 |
| HNRNPC | LINC00216 | 4.37E-13 | 0.364293 |
| HNRNPC | LINC01140 | 5.15E-12 | 0.348199 |
| HNRNPC | MAPKAPK5-AS1 | 7.18E-15 | 0.389257 |
| HNRNPC | MCM3AP-AS1 | 1.60E-31 | 0.556272 |
| HNRNPC | SNHG17 | 2.02E-14 | 0.383155 |
| CLK1 | ASMTL-AS1 | 1.37E-09 | 0.307907 |
| CLK1 | DLEU2 | 1.48E-13 | 0.3711 |
| CLK1 | GSN-AS1 | 2.79E-15 | 0.39471 |
| CLK1 | HLA-F-AS1 | 8.04E-10 | 0.312044 |
| CLK1 | IDI2-AS1 | 3.07E-12 | 0.351651 |
| CLK1 | INE1 | 1.02E-22 | 0.479398 |
| CLK1 | KLF3-AS1 | 9.05E-31 | 0.55041 |
| CLK1 | LINC00115 | 1.50E-19 | 0.44617 |
| CLK1 | LINC00216 | 4.85E-22 | 0.472607 |
| CLK1 | LINC00652 | 3.16E-11 | 0.335757 |
| CLK1 | MCM3AP-AS1 | 2.15E-17 | 0.421283 |
| GNG2 | GSN-AS1 | 4.49E-17 | 0.417411 |
| GNG2 | HAND2-AS1 | 6.73E-26 | 0.509475 |
| GNG2 | LINC01140 | 1.87E-12 | 0.354907 |
| GNG2 | MEG3 | 3.75E-10 | 0.317823 |
| YPEL5 | KLF3-AS1 | 1.87E-12 | 0.354936 |
| YPEL5 | LINC00216 | 2.02E-10 | 0.322419 |
| YPEL5 | LINC00652 | 1.85E-11 | 0.339478 |
| YPEL5 | MCM3AP-AS1 | 1.32E-10 | 0.325552 |
| HNRNPA1 | DLEU2 | 3.61E-19 | 0.441932 |
| HNRNPA1 | GUSBP11 | 8.47E-11 | 0.328742 |
| HNRNPA1 | HLA-F-AS1 | 6.52E-12 | 0.346618 |
| HNRNPA1 | KLF3-AS1 | 2.68E-13 | 0.367392 |
| HNRNPA1 | LINC00115 | 2.76E-09 | 0.302426 |
| HNRNPA1 | LINC00216 | 2.70E-09 | 0.302613 |
| HNRNPA1 | LINC00652 | 2.05E-11 | 0.338774 |
| HNRNPA1 | MAPKAPK5-AS1 | 6.29E-22 | 0.471457 |
| HNRNPA1 | MCM3AP-AS1 | 2.14E-28 | 0.531167 |
| HNRNPA1 | SNHG17 | 3.46E-22 | 0.474096 |
| RGS1 | GSN-AS1 | 3.69E-10 | 0.31793 |
| RGS1 | HAND2-AS1 | 6.19E-15 | 0.39012 |
| RGS1 | LINC01140 | 1.11E-09 | 0.309538 |
| RGS1 | MEG3 | 1.07E-11 | 0.343257 |
| RGS1 | PDCD4-AS1 | 2.08E-10 | 0.322215 |
| RPS27A | MAPKAPK5-AS1 | 1.04E-39 | 0.613347 |
| RPS27A | SNHG17 | 1.02E-36 | 0.593765 |
| RPS27A | SNX29P2 | 1.81E-14 | -0.38383 |
| STK4 | DLEU2 | 6.30E-28 | 0.527204 |
| STK4 | GSN-AS1 | 5.57E-18 | 0.428265 |
| STK4 | GUSBP11 | 3.14E-12 | 0.351508 |
| STK4 | HLA-F-AS1 | 3.50E-18 | 0.430635 |
| STK4 | IDI2-AS1 | 1.50E-12 | 0.35636 |
| STK4 | INE1 | 4.15E-18 | 0.429769 |
| STK4 | KLF3-AS1 | 2.24E-13 | 0.368496 |
| STK4 | LINC00115 | 4.24E-14 | 0.378729 |
| STK4 | LINC00216 | 4.46E-29 | 0.53681 |
| STK4 | LINC00652 | 4.08E-18 | 0.429855 |
| STK4 | LINC00667 | 3.76E-11 | 0.334523 |
| STK4 | LINC01140 | 2.01E-17 | 0.421633 |
| STK4 | MCM3AP-AS1 | 8.50E-43 | 0.632189 |
| EZR | GSN-AS1 | 1.45E-09 | 0.307509 |
| EZR | LINC01140 | 6.03E-13 | 0.362243 |
| EZR | MCM3AP-AS1 | 2.42E-12 | 0.35324 |
| BTG1 | LINC01140 | 1.92E-09 | 0.305275 |
| BTG1 | MCM3AP-AS1 | 1.52E-09 | 0.307123 |
| SRGN | GSN-AS1 | 1.82E-11 | 0.339608 |
| SRGN | HAND2-AS1 | 5.31E-20 | 0.45114 |
| SRGN | PDCD4-AS1 | 2.64E-10 | 0.32044 |
| SAMSN1 | GSN-AS1 | 1.28E-12 | 0.357394 |
| SAMSN1 | HAND2-AS1 | 6.78E-16 | 0.402685 |
| SAMSN1 | LINC01140 | 2.46E-12 | 0.353121 |
| SAMSN1 | PDCD4-AS1 | 2.59E-11 | 0.337132 |
| PPP1R2 | GSN-AS1 | 1.06E-09 | 0.309902 |
| PPP1R2 | INE1 | 8.35E-11 | 0.328849 |
| PPP1R2 | KLF3-AS1 | 1.13E-10 | 0.326641 |
| PPP1R2 | LINC00115 | 6.35E-11 | 0.330806 |
| PPP1R2 | LINC00216 | 1.64E-09 | 0.30653 |
| PPP1R2 | LINC00652 | 3.08E-12 | 0.351625 |
| PPP1R2 | LINC00667 | 5.05E-10 | 0.315572 |
| PPP1R2 | MCM3AP-AS1 | 3.94E-17 | 0.418111 |
| PDE4B | HAND2-AS1 | 8.94E-10 | 0.31123 |
| RPL23A | MAPKAPK5-AS1 | 1.03E-31 | 0.557733 |
| RPL23A | SNHG17 | 8.24E-31 | 0.55073 |
| RPL23A | SNX29P2 | 4.18E-11 | -0.33378 |
| KLRB1 | HAND2-AS1 | 1.19E-13 | 0.372454 |
| GIMAP7 | GSN-AS1 | 1.19E-11 | 0.342538 |
| GIMAP7 | HAND2-AS1 | 3.04E-19 | 0.442765 |
| TOB1 | CPS1-IT1 | 1.88E-18 | 0.43376 |
| TOB1 | MAPKAPK5-AS1 | 3.31E-14 | -0.38022 |
| TOB1 | SNHG17 | 2.48E-13 | -0.36788 |
| TOB1 | SNX29P2 | 6.39E-12 | 0.346747 |
| LBH | GSN-AS1 | 1.30E-13 | 0.371901 |
| LBH | HAND2-AS1 | 8.26E-48 | 0.660256 |
| LBH | LINC01140 | 6.60E-16 | 0.402829 |
| LBH | MEG3 | 6.71E-13 | 0.361566 |
| DNAJB6 | LINC01140 | 3.57E-11 | 0.334903 |
| DNAJB6 | MCM3AP-AS1 | 6.02E-17 | 0.415859 |
| NOP58 | DLEU2 | 7.06E-13 | 0.361234 |
| NOP58 | GUSBP11 | 3.58E-13 | 0.365559 |
| NOP58 | MAPKAPK5-AS1 | 1.13E-20 | 0.458403 |
| NOP58 | MCM3AP-AS1 | 2.02E-20 | 0.455693 |
| NOP58 | SNHG17 | 4.22E-32 | 0.560688 |
| ZNF331 | DGCR5 | 1.35E-10 | -0.32536 |
| ZNF331 | MCM3AP-AS1 | 3.20E-13 | 0.366259 |
| STK17B | DLEU2 | 2.06E-10 | 0.322258 |
| STK17B | GSN-AS1 | 1.60E-15 | 0.397884 |
| STK17B | HAND2-AS1 | 5.32E-18 | 0.428497 |
| STK17B | LINC00216 | 2.41E-11 | 0.337662 |
| STK17B | LINC01140 | 1.00E-15 | 0.400499 |
| STK17B | MCM3AP-AS1 | 3.70E-09 | 0.300095 |
| STK17B | PDCD4-AS1 | 7.63E-12 | 0.345547 |
| ALOX5AP | HAND2-AS1 | 1.35E-17 | 0.423695 |
| ALOX5AP | LINC01140 | 1.56E-09 | 0.306921 |
| ALOX5AP | PDCD4-AS1 | 3.76E-13 | 0.365246 |
| RHOF | GSN-AS1 | 2.82E-09 | 0.302246 |
| RHOF | GUSBP11 | 8.69E-17 | 0.413896 |
| RHOF | INE1 | 5.51E-10 | 0.314918 |
| RHOF | LINC00216 | 4.11E-12 | 0.349714 |
| RHOF | LINC01140 | 1.89E-16 | 0.409697 |
| RHOF | MCM3AP-AS1 | 1.80E-23 | 0.4868 |
| LDHB | GSN-AS1 | 2.44E-12 | 0.353164 |
| LDHB | HAND2-AS1 | 1.97E-22 | 0.476563 |
| STK17A | GUSBP11 | 9.19E-10 | 0.311017 |
| STK17A | LINC01140 | 1.62E-16 | 0.410543 |
| STK17A | MAPKAPK5-AS1 | 8.57E-17 | 0.413972 |
| STK17A | MCM3AP-AS1 | 1.02E-15 | 0.400408 |
| STK17A | SNHG17 | 3.51E-14 | 0.379861 |
| RAC2 | HAND2-AS1 | 6.60E-11 | 0.330539 |
| RAC2 | LINC01140 | 1.12E-10 | 0.326714 |
| RAC2 | PDCD4-AS1 | 9.16E-13 | 0.359564 |
| GYPC | HAND2-AS1 | 3.63E-18 | 0.43044 |
| GYPC | MEG3 | 2.02E-10 | 0.32242 |
| GPR65 | GSN-AS1 | 1.14E-11 | 0.342796 |
| GPR65 | HAND2-AS1 | 1.23E-22 | 0.478613 |
| GPR65 | LINC01140 | 5.56E-10 | 0.314844 |
| GPR65 | MEG3 | 2.41E-10 | 0.321108 |
| GPR65 | PDCD4-AS1 | 7.92E-11 | 0.329225 |
| AAK1 | GSN-AS1 | 1.99E-14 | 0.383266 |
| AAK1 | INE1 | 8.76E-15 | 0.388091 |
| AAK1 | LINC00216 | 4.27E-12 | 0.349457 |
| AAK1 | LINC00652 | 1.47E-10 | 0.324771 |
| AAK1 | LINC01140 | 2.95E-15 | 0.394379 |
| AAK1 | MCM3AP-AS1 | 2.36E-14 | 0.382235 |
| CCND2 | GSN-AS1 | 3.12E-17 | 0.419331 |
| CCND2 | HAND2-AS1 | 6.53E-25 | 0.500463 |
| CCND2 | LINC01140 | 3.39E-12 | 0.351001 |
| CCND2 | MEG3 | 6.04E-12 | 0.347125 |
| CCND2 | PDCD4-AS1 | 9.89E-11 | 0.327627 |
| RPL10A | MAPKAPK5-AS1 | 2.67E-17 | 0.420163 |
| RPL10A | SNHG17 | 1.25E-26 | 0.515999 |
| RPL10A | SNX29P2 | 2.37E-09 | -0.30363 |
| CCND3 | LINC00574 | 1.69E-09 | -0.3063 |
| SRSF2 | DLEU2 | 5.51E-31 | 0.552102 |
| SRSF2 | GUSBP11 | 2.11E-18 | 0.433174 |
| SRSF2 | HLA-F-AS1 | 5.80E-16 | 0.403545 |
| SRSF2 | INE1 | 3.64E-14 | 0.379647 |
| SRSF2 | KLF3-AS1 | 3.31E-15 | 0.393731 |
| SRSF2 | LINC00115 | 3.14E-20 | 0.453626 |
| SRSF2 | LINC00216 | 3.85E-16 | 0.405817 |
| SRSF2 | LINC00652 | 1.08E-14 | 0.386872 |
| SRSF2 | LINC00667 | 3.94E-12 | 0.349988 |
| SRSF2 | LINC01140 | 2.39E-13 | 0.368092 |
| SRSF2 | MAPKAPK5-AS1 | 6.06E-18 | 0.427839 |
| SRSF2 | MCM3AP-AS1 | 3.38E-46 | 0.651547 |
| SRSF2 | SNHG17 | 3.46E-18 | 0.430682 |
| SRSF2 | TCL6 | 9.01E-11 | 0.328299 |
| RPS15A | MAPKAPK5-AS1 | 8.66E-24 | 0.489868 |
| RPS15A | SNHG17 | 1.92E-20 | 0.455911 |
| DDIT4 | HAND2-AS1 | 3.27E-09 | 0.301088 |
| RGCC | HAND2-AS1 | 2.69E-13 | 0.367358 |
| RPL36AL | GSN-AS1 | 2.57E-11 | -0.3372 |
| RPL36AL | INE1 | 1.65E-09 | -0.30648 |
| RPL36AL | MAPKAPK5-AS1 | 1.38E-15 | 0.398709 |
| RPL36AL | SNX29P2 | 3.54E-09 | -0.30045 |
| SRSF3 | DLEU2 | 1.08E-23 | 0.488945 |
| SRSF3 | GUSBP11 | 1.70E-14 | 0.384195 |
| SRSF3 | HLA-F-AS1 | 4.67E-14 | 0.378145 |
| SRSF3 | KLF3-AS1 | 1.30E-10 | 0.32567 |
| SRSF3 | LINC00216 | 5.37E-10 | 0.315117 |
| SRSF3 | LINC00652 | 3.91E-12 | 0.350045 |
| SRSF3 | LINC01140 | 7.69E-10 | 0.312385 |
| SRSF3 | MAPKAPK5-AS1 | 1.80E-22 | 0.476956 |
| SRSF3 | MCM3AP-AS1 | 3.32E-32 | 0.561474 |
| SRSF3 | SNHG17 | 7.34E-26 | 0.509136 |
| CAPZA1 | DLEU2 | 6.35E-16 | 0.403049 |
| CAPZA1 | GSN-AS1 | 1.37E-11 | 0.341533 |
| CAPZA1 | INE1 | 4.32E-13 | 0.364376 |
| CAPZA1 | LINC00216 | 1.36E-16 | 0.411482 |
| CAPZA1 | LINC01140 | 3.69E-21 | 0.46351 |
| CAPZA1 | MCM3AP-AS1 | 4.43E-27 | 0.519933 |
| SH3KBP1 | PDCD4-AS1 | 1.02E-11 | 0.343572 |
| C12orf75 | INE1 | 1.22E-09 | 0.308805 |
| C12orf75 | LINC01140 | 9.61E-11 | 0.32783 |
| C12orf75 | MAPKAPK5-AS1 | 1.82E-12 | 0.355108 |
| C12orf75 | MCM3AP-AS1 | 2.45E-10 | 0.320999 |
| HMGB2 | DLEU2 | 5.92E-31 | 0.551859 |
| HMGB2 | GUSBP11 | 2.00E-11 | 0.338941 |
| HMGB2 | HLA-F-AS1 | 2.69E-17 | 0.420112 |
| HMGB2 | LINC00115 | 7.88E-14 | 0.374967 |
| HMGB2 | LINC00652 | 4.19E-10 | 0.316983 |
| HMGB2 | MAPKAPK5-AS1 | 1.44E-15 | 0.398454 |
| HMGB2 | MCM3AP-AS1 | 3.72E-25 | 0.502716 |
| HMGB2 | TCL6 | 1.56E-15 | 0.398026 |
| ZC3HAV1 | GSN-AS1 | 8.23E-13 | 0.360253 |
| ZC3HAV1 | LINC00216 | 4.49E-12 | 0.349129 |
| ZC3HAV1 | MCM3AP-AS1 | 2.12E-18 | 0.433169 |
| TAP1 | HLA-F-AS1 | 3.71E-12 | 0.350396 |
| TBC1D10C | HAND2-AS1 | 7.30E-10 | 0.312777 |
| RPS26 | MAPKAPK5-AS1 | 9.74E-23 | 0.479606 |
| RPS26 | SNHG17 | 1.56E-14 | 0.384687 |
| TANK | DLEU2 | 4.28E-13 | 0.364436 |
| TANK | GSN-AS1 | 2.87E-12 | 0.352111 |
| TANK | INE1 | 5.75E-14 | 0.376883 |
| TANK | KLF3-AS1 | 4.08E-18 | 0.429847 |
| TANK | LINC00216 | 2.22E-23 | 0.485909 |
| TANK | LINC01140 | 3.36E-09 | 0.300858 |
| TANK | MCM3AP-AS1 | 1.31E-20 | 0.457706 |
| HSPE1 | MAPKAPK5-AS1 | 3.85E-14 | 0.379305 |
| HSPE1 | OR7E47P | 2.53E-10 | -0.32075 |
| HSPE1 | SNHG17 | 9.04E-14 | 0.374125 |
| HSPE1 | SNX29P2 | 3.69E-10 | -0.31793 |
| ANP32E | DLEU2 | 3.23E-26 | 0.512335 |
| ANP32E | GUSBP11 | 7.11E-11 | 0.329998 |
| ANP32E | HLA-F-AS1 | 1.89E-25 | 0.505422 |
| ANP32E | LINC00115 | 7.24E-12 | 0.345902 |
| ANP32E | LINC00216 | 1.60E-14 | 0.38454 |
| ANP32E | LINC00652 | 1.42E-13 | 0.371331 |
| ANP32E | LINC00667 | 1.07E-11 | 0.343254 |
| ANP32E | MCM3AP-AS1 | 2.27E-27 | 0.522451 |
| ARF6 | DLEU2 | 1.13E-09 | 0.309391 |
| ARF6 | HLA-F-AS1 | 8.14E-10 | 0.311943 |
| ARF6 | KLF3-AS1 | 9.63E-11 | 0.327819 |
| ARF6 | LINC00216 | 5.34E-23 | 0.482186 |
| ARF6 | MCM3AP-AS1 | 3.46E-14 | 0.379949 |
| CHORDC1 | DGCR5 | 2.08E-09 | -0.30466 |
| CHORDC1 | DLEU2 | 1.52E-22 | 0.47769 |
| CHORDC1 | GSN-AS1 | 1.06E-11 | 0.343317 |
| CHORDC1 | GUSBP11 | 5.07E-12 | 0.348308 |
| CHORDC1 | IDI2-AS1 | 4.48E-10 | 0.316486 |
| CHORDC1 | INE1 | 2.11E-14 | 0.382923 |
| CHORDC1 | LINC00115 | 5.71E-11 | 0.331565 |
| CHORDC1 | LINC00216 | 2.63E-21 | 0.465057 |
| CHORDC1 | LINC00652 | 1.21E-10 | 0.326152 |
| CHORDC1 | LINC01140 | 9.26E-19 | 0.437296 |
| CHORDC1 | MCM3AP-AS1 | 1.81E-44 | 0.641883 |
| CACYBP | DLEU2 | 4.29E-12 | 0.349433 |
| CACYBP | GUSBP11 | 1.10E-11 | 0.343063 |
| CACYBP | MAPKAPK5-AS1 | 2.02E-25 | 0.505145 |
| CACYBP | MCM3AP-AS1 | 2.98E-15 | 0.394326 |
| CACYBP | SNHG17 | 2.88E-15 | 0.394519 |
| CD48 | HAND2-AS1 | 9.13E-17 | 0.413634 |
| CD48 | PDCD4-AS1 | 2.15E-13 | 0.368752 |
| PA2G4 | DLEU2 | 4.31E-12 | 0.349388 |
| PA2G4 | GUSBP11 | 6.07E-12 | 0.347101 |
| PA2G4 | MAPKAPK5-AS1 | 1.08E-55 | 0.699018 |
| PA2G4 | MCM3AP-AS1 | 2.93E-13 | 0.366812 |
| PA2G4 | SNHG17 | 4.53E-33 | 0.567951 |

**Supplementary Table 6**

Elements of the ceRNA network

| CD8 Tex-related lncRNAs | mirna | CD8 Tex-related mRNAs |
| --- | --- | --- |
| MAPKAPK5-AS1 | hsa-miR-124-3p | CCND2 |
| MAPKAPK5-AS1 | hsa-miR-154-5p | CCND2 |
| MAPKAPK5-AS1 | hsa-miR-200b-3p | ETS1 |
| MAPKAPK5-AS1 | hsa-miR-200c-3p | ETS1 |
| MAPKAPK5-AS1 | hsa-miR-506-3p | ETS1 |
| MCM3AP-AS1 | hsa-miR-138-5p | CCND3 |
| MCM3AP-AS1 | hsa-miR-15a-5p | CCND2 |
| MCM3AP-AS1 | hsa-miR-15a-5p | IFNG |
| MCM3AP-AS1 | hsa-miR-15b-5p | CCND3 |
| MCM3AP-AS1 | hsa-miR-15b-5p | IFNG |
| MCM3AP-AS1 | hsa-miR-16-5p | CCND3 |
| MCM3AP-AS1 | hsa-miR-16-5p | IFNG |
| MCM3AP-AS1 | hsa-miR-195-5p | CCND3 |
| MCM3AP-AS1 | hsa-miR-19a-3p | NR4A2 |
| MCM3AP-AS1 | hsa-miR-19a-3p | TNFAIP3 |
| MCM3AP-AS1 | hsa-miR-19b-3p | TNFAIP3 |
| MCM3AP-AS1 | hsa-miR-204-5p | EZR |
| MCM3AP-AS1 | hsa-miR-204-5p | CXCR4 |
| MCM3AP-AS1 | hsa-miR-224-5p | CXCR4 |
| MCM3AP-AS1 | hsa-miR-23a-3p | HMGB2 |
| MCM3AP-AS1 | hsa-miR-23a-3p | LDHB |

**Supplementary Table 7**

Primers of the candidate lncRNAs

| **Gene** |  | **Primer sequences (5′ to 3′)** |
| --- | --- | --- |
| MCM3AP-AS1 | Forward | GCTGCTAATGGCAACACTGA |
|  | Reverse | AGGTGCTGTCTGGTGGAGAT |
| MAPKAPK5-AS1 | Forward | GGCGTCGTGAGGTATGGATGTTC |
|  | Reverse | GCTTGACCACTTCTCGGCTGTG |
| PART1 | Forward | CTTCTCGTACGCTGGGCTAT |
|  | Reverse | TTGTTCCAGTGCAGCCCTTT |
| GAPDH | Forward | CAAGGTCATCCATGACAACTTTG |
|  | Reverse | TCCACCACCCTGTTGCTGTAG |

**Supplementary Table 8**

Sequences of siRNAs

| **Gene** |  | **Sequences (5′ to 3′)** |
| --- | --- | --- |
| siRNA MCM3AP-AS1 | Sense | AGGGAACAUGGAUGGAUCAAGUGAA |
|  | Antisense | UUCACUUGAUCCAUCCAUGUUCCCU |
| siRNA MAPKAPK5-AS1 | Sense | GAGCACAAAUCACACUCACCAGGGA |
|  | Antisense | UCCCUGGUGAGUGUGAUUUGUGCUC |
| siRNA PART1 | Forward | CGUCUUGAACUUGAUACACAUAGUA |
|  | Reverse | UACUAUGUGUAUCAAGUUCAAGACG |
